# Supplementary material
Source: publisher figshare collection journal article supplement (https://gsapubs.figshare.com/ndownloader/files/34981738)
Supplement: Supplementary file 1 [file 34981738]

## Sheet: Sheet1
Table S4. Summary of geochemistry data of intrusive rocks in the Beishan
Age(Ma)	217	238	259.7	259.7	259.7	262	262	262	262	262
Data sources	S. Li et al., 2012	S. Li et al., 2012	T. Bu et al., 2019	T. Bu et al., 2019	T. Bu et al., 2019	M. Li et al., 2020b	M. Li et al., 2020b	M. Li et al., 2020b	M. Li et al., 2020b	M. Li et al., 2020b
Rock type	granite porphyry	quartz monzonite	granodiorite	granodiorite	granodiorite	granodiorite	granodiorite	granodiorite	granodiorite	granodiorite
Latitude(°N)	Huaniushan	Dahuoluo	Dahuoluo	Dahuoluo	Dahuoluo	Hazhu	Hazhu	Hazhu	Hazhu	Hazhu
Longitude(°E)
Sample	HNS09823-1.8	B70817-2.1	D4314	D3360	141059	02.33.2	02.32.1	02.38.1	7907.1	02.32.2
SiO2	70.09	62.62	63.1	69.69	63.56	68.02	67.76	68.9	66.61	67.7
TiO2	0.35	1	0.92	0.41	0.9	0.46	0.51	0.46	0.53	0.5
Al2O3	15.16	15.5	15.23	15.3	14.86	15.78	15.32	15.48	16.01	15.86
Fe2O3T	2.283	4.43	4.646	2.434	4.53	3.33	3.49	3.19	3.91	3.47
FeOT	2.0709	4.01677	4.21277	2.20994	4.10778	2.99	3.14	2.87	3.52	3.12
Fe2O3	0.49	1.13	1.17	0.3	1.12	1.48	1.53	1.47	1.75	1.5
FeO	1.63	3	3.16	1.94	3.1	1.66	1.76	1.55	1.94	1.77
MnO	0.04	0.06	0.07	0.05	0.07	0.064	0.067	0.069	0.07	0.067
MgO	1.27	3.77	3.59	0.96	3.54	1.49	1.48	1.21	1.85	1.48
CaO	1.56	4.19	4.19	2.07	3.84	3.5	3.59	3.26	3.9	3.54
Na2O	4.68	4.12	3.95	4.29	3.89	4.18	4.07	4.22	4.06	4.31
K2O	3.15	3.75	3.54	3.5	3.47	2.73	2.75	2.67	2.37	2.62
P2O5	0.09	0.15	0.31	0.13	0.33	0.12	0.13	0.13	0.14	0.12
LOI	1.18	0.5	0.74	1.36	0.83	0.33	0.83	0.42	0.56	0.34
Total	99.68	99.78	99.97	100	99.51	99.81	99.8	99.84	99.79	99.81
A/CNK	1.61448	1.28524	1.30394	1.55172	1.32679	1.51585	1.47166	1.52512	1.54985	1.5148
Mg#	52.2253	62.5892	60.3021	43.6409	60.5702	47.0419	45.6574	42.9068	48.3696	45.8159
Li
Be
Sc	4.94	10.18	10.5	4.12	11.2	9.56	7.53	8.18	10.3	8.06
V	40.6	84.41				55	56.3	47.6	70	56.5
Cr	21	118.72	177	21.6	111	9.62	9.4	7.68	19.7	8.55
Co	5.93	15.7	18.6	5.25	16.8	7.69	7.8	6.25	9.61	7.92
Ni	19.2	76.52	94.7	8.72	77	7.92	7.12	4.76	14.4	7
Cu
Zn
Ga	17.7	20.86				15.2	15.5	15.9	15.8	15.5
Rb	58.9	157.28	162	155	145	85.4	79.8	74.2	63.1	71.5
Sr	229	734.84	862	454	849	362	337	341	406	358
Y	9.38	17.59	18.3	10.1	18.4	16.8	15.4	18.2	15.4	16.3
Zr	171	332.81	305	224	304	116	125	160	142	163
Nb	4.97	13.28	14.6	7.42	13	5.62	6.14	6.2	4.93	5.79
Cs	3.38	6.52	6.79	3.49	6.15	6.27	3.23	3.23	3.18	2.64
Ba	633	912.01	1020	692	1070	591	494	504	461	490
La	12.5	50.61	21	42.2	52.5	13.7	14.4	15.5	16.3	16.6
Ce	22.8	102.64	43.1	77.7	108	25	25.2	27.4	27.8	27.8
Pr	3.14	11.99	4.96	8.48	12.5	3.32	3.33	3.76	3.61	3.7
Nd	11.8	44.63	18.2	27.9	44.8	12.8	12.5	14.1	13.7	13.9
Sm	2.18	7.41	3.66	4.94	7.87	2.72	2.57	2.81	2.66	2.74
Eu	0.62	1.77	0.9	1.26	1.98	0.77	0.71	0.74	0.82	0.77
Gd	1.97	5.66	2.79	3.94	5.85	2.84	2.58	2.96	2.81	2.78
Tb	0.35	0.7	0.37	0.52	0.81	0.46	0.41	0.46	0.43	0.44
Dy	1.93	3.7	1.83	2.51	3.91	2.69	2.5	2.81	2.48	2.69
Ho	0.38	0.68	0.35	0.42	0.72	0.52	0.5	0.58	0.48	0.54
Er	1.1	1.81	0.92	1.08	1.9	1.5	1.43	1.7	1.37	1.55
Tm	0.16	0.26	0.13	0.16	0.27	0.24	0.22	0.27	0.21	0.25
Yb	1.06	1.55	0.81	0.95	1.66	1.64	1.56	1.91	1.48	1.71
Lu	0.16	0.22	0.12	0.15	0.25	0.26	0.26	0.31	0.25	0.28
Hf	4.97	7.93	6.32	4.63	7.6	3.04	3.44	4.42	3.61	4.25
Ta	0.42	0.73	1.11	0.76	0.97	0.48	0.55	0.53	0.38	0.53
Pb	8.07	26.6	32	28.8	28.6
Th	6.87	21.33	21.4	16.5	20	5.26	6.67	8.74	5.35	6.23
U	1.86	2.33	2.75	4.57	2.45	1.08	1.33	1.47	1.01	1.24
Sr/Y	24.4136	41.776	47.1038	44.9505	46.1413	21.5476	21.8831	18.7363	26.3636	21.9632
Eu/Eu*	0.898065	0.804689	0.828998	0.845607	0.855935	0.840989	0.834874	0.779294	0.911087	0.84537
(La/Yb)N	7.9504	22.0135	17.4791	29.9484	21.3224	5.63198	6.22333	5.4712	7.42524	6.5448
Rb/Sr	0.257205	0.214033	0.187935	0.34141	0.170789	0.235912	0.236795	0.217595	0.155419	0.199721
(La/Yb)N_thickness (km)	35.5885	52.9019	48.9808	58.1348	52.3596	29.7276	31.4249	29.2352	34.4268	32.2811
Age(Ma)	262	262	262	270.2	270.2	272	272	272	281	281
Data sources	M. Li et al., 2020b	M. Li et al., 2020b	M. Li et al., 2020b	R. G. Zheng et al., 2020	R. G. Zheng et al., 2020	W. Zhang, 2013	W. Zhang, 2013	W. Zhang, 2013	R. G. Zheng et al., 2014	Y. Yuan et al., 2018
Rock type	granodiorite	granodiorite	granodiorite	dioritic dike	dioritic dike	granodiorite	monzodiorite	monzodiorite	gabbro	quartz diorite
Latitude(°N)	Hazhu	Hazhu	Hazhu	Yinaoxia	Yinaoxia	Shuangjingzi	Shuangjingzi	Shuangjingzi	Yinaoxia	Shuangjingzi
Longitude(°E)
Sample	02.25.2	7965.2	02.31.1	BS03-9	BS03-7	BS07-180	BS07-177	BS07-183	Y-1	X10-46-1
SiO2	69.61	66.12	69.03	55.3	55.06	68.65	56.13	62.4	55.62	61.82
TiO2	0.42	0.57	0.47	0.902	0.92	0.53	1.18	0.9	1.59	0.99
Al2O3	14.78	15.93	15.09	14.95	15.82	15.31	18	15.96	15.48	14.93
Fe2O3T	2.92	4.13	3.25	15.172	7.643	3.88	8.31	6.14	9.54	6.6825
FeOT	2.62	3.72	2.93	13.7102	6.92347	3.49122	7.47734	5.52477	8.58409	6.075
Fe2O3	1.06	1.93	1.51	8.88	2.66
FeO	1.67	1.98	1.57	5.72	4.53
MnO	0.072	0.072	0.063	0.278	0.13	0.07	0.17	0.1	0.16	0.11
MgO	1.04	1.98	1.32	5.61	5.95	1.5	3.56	2.6	5.46	2.71
CaO	3.15	3.99	3.23	5.43	7.49	3.12	5.9	4.67	5.6	5.01
Na2O	4.12	4.03	4.03	3.42	3.35	3.93	3.63	4.14	2.79	3.42
K2O	3.02	2.33	2.84	1.235	1.09	2.77	2.62	2.73	0.52	3.19
P2O5	0.12	0.14	0.12	0.138	0.13	0.1	0.3	0.19	0.27	0.28
LOI	0.76	0.7	0.55	3.82	1.89	1.15	2.6	2.7	2.83	0.95
Total	99.82	99.77	99.82			101.01	102.39	102.53	99.85	99.485
A/CNK	1.43635	1.53913	1.49406	1.4824	1.32607	1.55906	1.48148	1.38302	1.73737	1.28485
Mg#	41.4373	48.6855	44.5385	42.1759	60.504	43.3705	45.9072	45.6189	53.1352	44.295
Li				27.7	13.1				13.9	14.7653
Be				2.05	0.96				1.29	1.50623
Sc	8.74	10.7	7.63	23.1	26.7				31
V	44.6	73.2	55.2	210	190	61.7	144.6	111.6	183	131.479
Cr	4.42	17.5	7.74	123	207					58.2206
Co	5.64	10.6	7.21	36.6	29.3				33.8	14.4536
Ni	4.41	13.8	6.5	33.2	81.2					21.3893
Cu
Zn
Ga	15.2	15.5	14.8	15.7	16.4	20	22	20	17.9	17.6234
Rb	91.5	59.6	76	10.2	56.1	99	144	107	3.71	105.051
Sr	288	407	327	212	205	345	656	437	232	318.787
Y	19.6	16	16.2	21.2	26.2	11.8	20.4	22.2	40.1	26.2325
Zr	148	138	170	104	99.7	150	150	231	299	302.438
Nb	6.52	5.08	5.36	3.71	4.86	4.9	5.5	7	8.84	9.50711
Cs	5.08	2.1	3.85	0.93	0.9				0.38
Ba	517	475	470	103	160	420	633	473	222	520.607
La	17.4	17.8	21.7	11.1	18.2	13.2	17	22.5	15.5	21.3635
Ce	29.6	29.1	34.6	22.8	33.7	30	37	50	39.5	50.2974
Pr	4.06	3.98	4.6	2.89	3.99	3.4	4.6	6	5.09	6.68978
Nd	15	15	16	13.8	15.2	13.7	20.6	25	23.5	28.9907
Sm	3.04	2.9	2.8	3.35	3.83	2.94	4.83	5.37	5.96	6.2441
Eu	0.66	0.85	0.72	1.15	1.07	0.744	1.433	1.17	1.74	1.42469
Gd	3.02	2.79	2.95	3.15	4.4	2.35	4.23	4.49	7.04	5.55899
Tb	0.5	0.44	0.45	0.65	0.71				1.16	0.868179
Dy	3	2.67	2.57	3.5	4.64	2.23	4	4.28	7.42	4.95856
Ho	0.64	0.52	0.52	0.764	0.94				1.52	0.910271
Er	1.91	1.43	1.49	2.21	2.82	1.23	2.25	2.42	4.5	2.47388
Tm	0.3	0.23	0.24	0.38	0.42				0.642	0.346367
Yb	2.15	1.52	1.74	2.14	2.77	1.29	2.1	2.36	4.25	2.18875
Lu	0.34	0.24	0.29	0.293	0.43	0.187	0.306	0.343	0.621	0.312589
Hf	4.36	3.53	4.55	2.54	3.31	3.86	3.66	5.75	6.34	7.8279
Ta	0.58	0.41	0.49	0.26	0.52	0.4	0.4	0.5	0.593	0.49646
Pb				8.68	2.36	9.9	7.4	11.1	11.8	14.6401
Th	8.03	5.12	6.62	2.57	7.08	7.4	5.2	9.1	3.54	8.49409
U	1.24	1.11	1.22	1	1.85	1.88	2.27	2.29	1.3	2.46967
Sr/Y	14.6939	25.4375	20.1852	10	7.82443	29.2373	32.1569	19.6847	5.78554	12.1524
Eu/Eu*	0.659053	0.901936	0.760879	1.06649	0.79487	0.838288	0.94871	0.709464	0.819923	0.72483
(La/Yb)N	5.45626	7.89516	8.40805	3.49699	4.42972	6.89872	5.45776	6.42769	2.45882	6.58054
Rb/Sr	0.317708	0.146437	0.232416	0.0481132	0.273659	0.286957	0.219512	0.244851	0.0159914	0.329533
(La/Yb)N_thickness (km)	29.1887	35.47	36.54	21.6261	25.6455	33.1765	29.1934	31.9742	15.6383	32.3737
Age(Ma)	281.8	281.8	281.8	284	284	284	284	287	291.4	291.4
Data sources	P. F. Yi et al., 2017	P. F. Yi et al., 2017	P. F. Yi et al., 2017	R. G. Zheng et al., 2016b	R. G. Zheng et al., 2016b	R. G. Zheng et al., 2016b	R. G. Zheng et al., 2016b	Y. Yuan et al., 2018	Y. Y. Zhang et al., 2011	Y. Y. Zhang et al., 2011
Rock type	granodiorite	granodiorite	granodiorite	granodiorite	granodiorite	granodiorite	granodiorite	quartz diorite	diorite	diorite
Latitude(°N)	E. Zhangfangshan	E. Zhangfangshan	E. Zhangfangshan	Shuangjingzi	Shuangjingzi	Shuangjingzi	Shuangjingzi	Shuangjingzi	Liuyuan	Liuyuan
Longitude(°E)
Sample	P16/GS2	P16/GS1	P1/GS1	B12-14	B12-13	B12-9	B12-10	X10-47-1	LY15-7-3	LY15-7
SiO2	66.77	64.85	65.48	71.9	70.34	71.86	71.31	66.74	68.688	71
TiO2	0.53	0.56	0.76	0.25	0.23	0.23	0.29	0.57	0.449	0.356
Al2O3	15.49	15.3	15	15.11	15.47	15.6	15.1	14.74	16.031	15.657
Fe2O3T	5.078	5.852	5.184	1.8	1.74	1.71	2.13	3.9501	2.582	2.132
FeOT	4.5884	5.28832	4.69972	1.61964	1.56565	1.53866	1.91657	3.591	2.32328	1.91837
Fe2O3	3.01	3.41	1.4
FeO	1.88	2.22	3.44
MnO	0.07	0.08	0.09	0.03	0.04	0.04	0.05	0.06	0.048	0.03
MgO	1.62	1.78	2.55	0.85	1.06	0.98	1.29	1.64	1.453	1.048
CaO	3.25	3.48	3.92	2.63	2.78	2.81	2.96	3.34	4.555	3.373
Na2O	4.72	4.05	3.23	4.86	6.14	4.56	4.26	4.14	5.574	5.571
K2O	1.9	2.21	1.9	1.37	1.51	1.61	1.64	2.62	0.205	0.187
P2O5	0.12	0.12	0.16	0.06	0.06	0.04	0.07	0.15	0.089	0.065
LOI	1.29	1.6	1.55	1.05	0.52	0.49	0.82	2.01	0.304	0.564
Total	100.65	99.66	99.46	99.91	99.88	99.92	99.91	99.601	99.978	99.983
A/CNK	1.5694	1.57084	1.65746	1.70542	1.48322	1.73719	1.70429	1.45941	1.55129	1.71471
Mg#	38.6258	37.4994	49.1657	48.3335	54.6863	53.1688	54.5409	44.8756	52.7145	49.3361
Li				17.83	22.3	19.91	11.97	21.7252
Be				1.15	1.16	1.15	1.23	1.70946
Sc				2.67	2.78	3.36	3.89
V	64	78.67	101.52	21.39	23.11	24.62	29.98	76.5428
Cr	22.06	18.38	54.31	0.88	5.38	6.77	11.49	34.0157	13.723	11.246
Co	7.72	10.11	13.38	3.7	3.68	3.7	4.98	9.31833
Ni				3.75	2.42	2.61	6.15	14.9622	9.507	7.174
Cu	17.54	22.49	15.99
Zn	39.88	47.13	76.13
Ga	13.37	14.36	18.83	16.11	16.61	16.5	16.78	18.0506
Rb	48.32	47.34	88.84	47.68	52.67	47.96	57.55	83.7733	3.079	2.389
Sr	226.93	291.65	255.42	274.6	281.1	296.1	284.7	327.65	180.8	159.7
Y	20.25	19.75	23.71	6.12	6.23	6.99	8.54	17.5189	27.324	24.701
Zr	185.01	196.08	143.82	105.4	109	101	113.9	184.44	184.113	161.98
Nb	4.42	5.75	13.36	1.55	1.43	1.69	2.39	5.26326	7.033	7.246
Cs				2.44	2.55	2.33	4.03
Ba	283.55	109.25	430.78	226.8	258.3	273.1	246	414.778	73.668	120.248
La	13.48	14.47	18	9.65	10.79	10.92	12.57	20.8868	8.57	23.762
Ce	34.31	37.94	24.17	20.57	21.64	22.7	25.9	43.7415	21.172	44.598
Pr	3.94	4.69	5.07	2.34	2.47	2.62	3.1	5.21496	2.928	5.166
Nd	15.69	18.34	19.47	9.11	9.54	10.19	12.11	20.2121	12.82	18.68
Sm	3.6	3.94	4.14	1.71	1.7	1.93	2.32	4.21268	3.587	3.748
Eu	0.9	0.91	1.08	0.572	0.592	0.592	0.661	0.930038	0.641	0.631
Gd	3.16	3.31	3.76	1.59	1.57	1.8	2.15	3.5927	4.164	4.036
Tb	0.59	0.6	0.74	0.232	0.233	0.263	0.324	0.55907	0.792	0.706
Dy	3.57	3.52	4.4	1.16	1.13	1.33	1.63	3.28388	5.246	4.448
Ho	0.76	0.75	0.88	0.231	0.223	0.252	0.312	0.637214	1.114	0.991
Er	2.1	2.08	2.8	0.601	0.591	0.663	0.821	1.86433	3.079	2.723
Tm	0.33	0.34	0.4	0.0724	0.0734	0.0931	0.113	0.286073	0.457	0.432
Yb	2.28	2.29	2.49	0.602	0.604	0.661	0.781	1.79387	2.87	2.694
Lu	0.36	0.36	0.4	0.0723	0.0831	0.0913	0.112	0.267025	0.435	0.413
Hf				3.15	3.18	3.05	3.33	5.00539	5.164	4.936
Ta	0.49	0.64	1.18	0.184	0.214	0.212	0.341	0.451841	0.719	0.873
Pb				12.5	8.51	8.93	9.95	13.7042	3.894	3.947
Th	4.94	6.92	12.55	3.62	3.46	4.24	5.68	9.80474	12.314	18.576
U	1.4	1.68	2.1	1.19	1.02	1.21	1.25	2.84207	2.019	3.324
Sr/Y	11.2064	14.7671	10.7727	44.8693	45.1204	42.3605	33.3372	18.7026	6.61689	6.46533
Eu/Eu*	0.798694	0.750701	0.822078	1.04403	1.08993	0.956171	0.890478	0.713381	0.50598	0.493343
(La/Yb)N	3.98602	4.26008	4.87369	10.8073	12.044	11.138	10.851	7.84992	2.01318	5.94662
Rb/Sr	0.212929	0.162318	0.347819	0.173634	0.187371	0.161972	0.202143	0.255679	0.0170299	0.0149593
(La/Yb)N_thickness (km)	23.8512	24.9816	27.2692	40.8074	42.6493	41.3198	40.8761	35.3723	12.2389	30.6517
Age(Ma)	302.26	302.26	302.26	302.26	302.26	302.26	302.26	302.26	302.26	303.4
Data sources	F. L. Yang et al., 2017	F. L. Yang et al., 2017	F. L. Yang et al., 2017	F. L. Yang et al., 2017	F. L. Yang et al., 2017	F. L. Yang et al., 2017	F. L. Yang et al., 2017	F. L. Yang et al., 2017	F. L. Yang et al., 2017	Z. X. Zhao et al., 2018
Rock type	quartz diorite	quartz diorite	quartz diorite	quartz diorite	quartz diorite	quartz diorite	quartz diorite	quartz diorite	quartz diorite	granodiorite
Latitude(°N)	Pengboshan	Pengboshan	Pengboshan	Pengboshan	Pengboshan	Pengboshan	Pengboshan	Pengboshan	Pengboshan	Dulongbao
Longitude(°E)
Sample	D3483GS1	D3484GS1	D3485GS1	D3480GS1	D3488GS1	D3486GS1	D3482GS1	D3487GS1	PM022031GS1	5026
SiO2	55.57	57.17	58.29	58.09	61.61	61	58.63	60.18	62.69	66.72
TiO2	0.76	0.73	0.78	0.96	0.76	0.71	0.9	0.64	0.67	0.48
Al2O3	15.96	16.35	15.73	15.43	14.23	15.53	15.55	16.17	15.12	15.71
Fe2O3T	9.506	7.86	7.945	7.944	7.846	6.725	8.41	6.724	6.144	4.016
FeOT	8.61441	7.11331	7.20052	7.20259	7.09928	6.08028	7.61944	6.08132	5.56762	3.63363
Fe2O3	2.95	3.46	2.39	2.07	3.6	3.59	2.8	3.38	1.92	1.86
FeO	5.96	4	5.05	5.34	3.86	2.85	5.1	3.04	3.84	1.96
MnO	0.16	0.14	0.16	0.13	0.13	0.12	0.14	0.13	0.1	0.073
MgO	4.22	3.71	3.73	3.02	3.48	3.08	3.35	3.2	2.93	1.79
CaO	7.74	6.37	5.83	5.76	4.74	5.32	5.14	5.7	4.75	4.16
Na2O	2.5	2.77	3.21	3.17	2.46	2.72	3.16	3.19	2.83	3.84
K2O	1.21	2.2	1.65	1.19	2.7	2.05	1.87	1.76	1.66	2.23
P2O5	0.13	0.15	0.15	0.2	0.16	0.14	0.17	0.14	0.14	0.081
LOI	2.7	2.79	2.87	4.5	2.07	2.75	3	2.34	3.24	0.98
Total										99.89
A/CNK	1.39389	1.4418	1.47147	1.5247	1.43737	1.53915	1.52901	1.51831	1.63636	1.53568
Mg#	46.6161	48.1783	48.0083	42.7723	46.632	47.4501	43.9373	48.3997	48.4023	46.7551
Li	24.35	19.03	32.74	27.07	31.16	17.65	58.05	15.49	19.27
Be
Sc
V	238.26	183.16	212.16	183.98	192.33	164.6	180.15	174.23	154.9	79.8
Cr										14.6
Co										10.4
Ni	8.71	11.44	12.95	9.63	14.09	12.88	9.74	13.67	42.03	9.1
Cu
Zn
Ga
Rb	43.14	97.09	51.35	54.08	106.68	75.34	68.82	71.2	58.85	74.5
Sr	291.17	349.55	447.2	248.12	308.28	383.99	326.34	411.6	425.38	221
Y	26.49	19.7	28.51	29.92	26.26	17.65	35.55	22.16	13.2	17.4
Zr	110.79	144.93	176.3	171.64	226.86	157.29	205.66	166.41	144.98	147
Nb	5	6.7	8.24	6.59	8.7	7.14	6.56	8.18	4.9	3.69
Cs	6.06	5.08	3.15	3.58	6.81	3.89	5.39	3.41	5
Ba	286.2	281	367.4	325.4	629.2	334.4	441.3	272.6	332.12	444
La	11.87	12.17	12.84	14.13	15	16.06	16.54	17.65	18.4	13.1
Ce	26.68	31.1	34.77	32.66	37.29	34.96	39.13	38.7	36.75	28
Pr	3.49	4.18	4.86	4.36	5.12	4.25	5.25	4.69	4.07	3.2
Nd	14.99	17.09	21.3	19.25	22.44	16.79	22.75	19.45	14.02	12.5
Sm	3.76	3.55	5.21	4.8	5.11	3.38	5.58	4.18	2.77	2.79
Eu	0.94	0.94	1.22	1.15	1.08	0.98	1.06	1.02	0.96	0.8
Gd	3.72	2.95	4.64	4.58	4.26	3.16	5.38	3.81	2.72	2.46
Tb	0.77	0.55	0.88	0.9	0.77	0.55	1.05	0.68	0.45	0.44
Dy	4.73	3.32	5.16	5.28	4.61	3.22	6.47	4.07	2.61	2.77
Ho	1	0.7	1.06	1.15	0.98	0.67	1.33	0.85	0.49	0.54
Er	3.02	2.15	3.1	3.27	2.88	1.92	4	2.4	1.4	1.63
Tm	0.48	0.38	0.5	0.51	0.47	0.32	0.64	0.38	0.24	0.28
Yb	3.39	2.62	3.51	3.52	3.19	2.17	4.33	2.63	1.65	1.82
Lu	0.49	0.39	0.5	0.47	0.46	0.3	0.57	0.37	0.26	0.29
Hf	5.32	8.55	11.02	10.24	12.82	9.22	13.66	10.43	9.29	4.57
Ta	0.66	0.72	0.91	0.74	0.94	0.83	0.77	0.86	0.54	0.33
Pb										7.36
Th	7.66	5.41	6.6	8.06	9.81	8.32	9.97	8.34	12.16	6.28
U	1.28	1.35	1.22	1.34	2.21	2.33	2.39	2.36	2.41	1.33
Sr/Y	10.9917	17.7437	15.6857	8.29278	11.7395	21.7558	9.17975	18.574	32.2258	12.7011
Eu/Eu*	0.760239	0.864273	0.743783	0.739797	0.688996	0.902911	0.584024	0.767854	1.05729	0.91443
(La/Yb)N	2.36067	3.13165	2.46628	2.70635	3.17019	4.98965	2.57533	4.52453	7.51828	4.85271
Rb/Sr	0.148161	0.277757	0.114826	0.217959	0.346049	0.196203	0.210884	0.172983	0.138347	0.337104
(La/Yb)N_thickness (km)	14.9458	19.7503	15.6898	17.269	19.9582	27.669	16.4253	26.0055	34.6385	27.1959
Age(Ma)	303.4	303.4	303.4	303.43	303.43	305	306	306	306	306
Data sources	Z. X. Zhao et al., 2018	Z. X. Zhao et al., 2018	Z. X. Zhao et al., 2018	F. L. Yang et al., 2017	F. L. Yang et al., 2017	W. B. Yang et al., 2020	M. Li et al., 2018	M. Li et al., 2018	M. Li et al., 2018	M. Li et al., 2018
Rock type	granodiorite	granodiorite	granodiorite	quartz diorite	quartz diorite	trondhjemite	granodiorite	granodiorite	granodiorite	granodiorite
Latitude(°N)	Dulongbao	Dulongbao	Dulongbao	Pengboshan	Pengboshan	Hongshishan	Hazhu	Hazhu	Hazhu	Hazhu
Longitude(°E)
Sample	5032	5031	5025	PM022008GS1	PM022001GS1	PM501Gs-33	16.4	16.5	16.2	16.3
SiO2	67.1	63.73	67.96	61.83	60.38	68.69	60.14	60.21	63.04	61.04
TiO2	0.46	0.63	0.49	0.73	0.49	0.4	0.7	0.56	0.61	0.62
Al2O3	15.38	15.89	15.37	15.26	15.62	15.12	16.33	16.23	15.57	16.09
Fe2O3T	4.046	5.392	3.863	6.051	6.734	3.087	6.87	6.73	6.02	6.63
FeOT	3.66062	4.88259	3.49463	5.48261	6.09645	2.79168	6.18	6.05	5.12	5.96
Fe2O3	1.89	2.07	1.85	1.97	2.73	1.58	3.26	2.86	3.29	3.28
FeO	1.96	3.02	1.83	3.71	3.64	1.37	3.25	3.48	2.46	3.01
MnO	0.076	0.1	0.073	0.1	0.13	0.063	0.12	0.12	0.11	0.11
MgO	1.8	2.41	1.55	2.98	3.12	0.85	3.04	2.96	2.49	2.93
CaO	3.98	4.69	3.62	4.99	6.23	3.23	5.66	6.16	4.61	5.15
Na2O	3.79	3.82	4.03	2.6	2.93	4.47	3.05	3.08	3.12	3.07
K2O	2.4	2.39	2.41	2.36	2.37	2	2.15	2.58	2.5	2.5
P2O5	0.081	0.11	0.086	0.15	0.15	0.17	0.14	0.14	0.14	0.14
LOI	0.98	1.01	0.61	3.19	2.1		1.8	1.22	1.8	1.42
Total	99.89	99.87	99.88			99.32
A/CNK	1.51229	1.4578	1.52783	1.53367	1.35473	1.55876	1.50368	1.3731	1.52199	1.50093
Mg#	46.7095	46.8041	44.1535	49.2095	47.7057	35.1802	46.7191	46.5845	46.4352	46.704
Li				19.68	11.81
Be
Sc						6.64	18.1	21.2	15.4	18.1
V	101.8	107.1	90.8	158.3	182.3	32.1	158	144	123	140
Cr	15.4	15.2	12.9			17.37	12	17.8	11.4	15.7
Co	10	12.3	8.67			5.66	18.6	17.4	14.4	17.4
Ni	7.4	8.9	6.5	16.11	10.31	2.59	12.1	12.2	9.25	11.3
Cu
Zn
Ga						20.09	17.8	17	16.7	17.1
Rb	60.9	67.9	69.9	93.01	74.11	65.15	62.2	80.7	66.1	79.6
Sr	222	224	205	339.55	385.15	223.78	278	357	276	287
Y	17.8	26.3	22.8	14.608	34.9712	14.95	21	22.6	16.5	18.6
Zr	136	142	183	135.22	214.24	259.9	99.2	140	121	65.2
Nb	3.88	4.99	4.64	6.23	5.3	5.41	7.33	5.8	7.03	5.88
Cs				3.82	4.06	2.05	4.15	5.83	2.93	4.39
Ba	454	517	512	471.2	494.15	240.57	298	415	322	328
La	14.4	17.6	18.9	10.13	24.83	20.06	16.1	17.8	18.9	20.7
Ce	30.5	39.4	38.4	23.03	55.94	42.51	37.9	41.2	39.2	41.6
Pr	3.42	4.62	4.27	3.03	7.69	5.6	5.3	5.72	4.76	5.32
Nd	13.1	18.3	16.3	12.29	29.84	19.99	21.6	23.4	18.3	21.2
Sm	2.82	4.07	3.44	2.67	6.73	4.4	4.74	4.98	3.67	4.53
Eu	0.79	1.01	0.94	0.73	1.37	1.09	1.1	1.19	0.85	1.08
Gd	2.52	3.76	3.27	2.5	6.34	3.86	4.31	4.69	3.3	4.35
Tb	0.44	0.67	0.58	0.45	1.12	0.61	0.72	0.76	0.51	0.68
Dy	2.69	4.16	3.61	2.77	6.83	3.09	4.41	4.66	3.15	4.06
Ho	0.54	0.83	0.73	0.52	1.31	0.54	0.94	0.98	0.65	0.83
Er	1.64	2.46	2.12	1.5	3.79	1.36	2.65	2.81	1.86	2.43
Tm	0.27	0.4	0.35	0.25	0.63	0.19	0.41	0.44	0.29	0.37
Yb	1.85	2.65	2.36	1.73	4.22	1.1	2.82	2.94	1.92	2.47
Lu	0.3	0.42	0.39	0.24	0.57	0.16	0.44	0.46	0.3	0.38
Hf	4.15	4.37	5.64	7.1	13.08	7.88	4	5.13	3.97	2.77
Ta	0.36	0.43	0.37	0.68	0.5	0.9	0.81	0.52	0.59	0.65
Pb	7.24	6.93	7.48
Th	8.19	7.21	8.96	5.63	12.26	6.95	14.3	9.53	10.7	12.6
U	1.38	1.52	1.2	1.18	1.8	1.36	3.23	1.87	1.87	2.14
Sr/Y	12.4719	8.51711	8.99123	23.2441	11.0133	14.9686	13.2381	15.7965	16.7273	15.4301
Eu/Eu*	0.88861	0.776593	0.8451	0.850893	0.631936	0.791614	0.730964	0.74189	0.732824	0.734214
(La/Yb)N	5.24778	4.47766	5.39926	3.94773	3.96688	12.2948	3.84912	4.08185	6.63659	5.65012
Rb/Sr	0.274324	0.303125	0.340976	0.273921	0.192419	0.291134	0.223741	0.22605	0.239493	0.277352
(La/Yb)N_thickness (km)	28.5264	25.8285	29.0102	23.6871	23.7694	42.9998	23.2571	24.2551	32.5179	29.7823
Age(Ma)	306	308	308	308	308	308	308	308	308	308
Data sources	M. Li et al., 2018	X. M. Xu et al., 2018a	X. M. Xu et al., 2018a	X. M. Xu et al., 2018a	X. M. Xu et al., 2018a	X. M. Xu et al., 2018a	X. M. Xu et al., 2018a	X. M. Xu et al., 2018a	X. M. Xu et al., 2018a	X. M. Xu et al., 2018a
Rock type	granodiorite	quartz diorite	quartz diorite	quartz diorite	quartz diorite	quartz diorite	quartz diorite	quartz diorite	quartz diorite	quartz diorite
Latitude(°N)	Hazhu	Baiheshan	Baiheshan	Baiheshan	Baiheshan	Baiheshan	Baiheshan	Baiheshan	Baiheshan	Baiheshan
Longitude(°E)
Sample	16.1	PM13YQ11	PM13YQ7	PM13YQ3	PM13YQ5	PM13YQ4	PM13YQ8	PM13YQ1	PM13YQ6	PM13YQ2
SiO2	64.04	62.92	60	65.99	66.74	68.8	64.5	66.89	61.27	69.86
TiO2	0.56	0.82	0.97	0.69	0.65	0.54	0.76	0.65	0.78	0.5
Al2O3	15.39	16.06	16.6	15.79	15.31	15.34	15.7	15.91	16.03	14.89
Fe2O3T	5.48	6.124	7.685	4.893	4.898	3.72	5.446	4.328	6.885	3.39
FeOT	4.94	5.5394	6.9492	4.41427	4.42746	3.36463	4.92545	3.9207	6.22425	3.06872
Fe2O3	2.65	3	4	3.65	2.72	1.85	2.74	1.49	3.75	1.41
FeO	2.55	2.84	3.35	1.13	1.98	1.7	2.46	2.58	2.85	1.8
MnO	0.1	0.18	0.18	0.14	0.1	0.1	0.12	0.16	0.17	0.095
MgO	2.36	2.05	2.49	1.48	1.48	1.06	1.7	1.45	2.6	0.99
CaO	4.28	4.2	5.27	3.52	3.3	3.15	3.64	3.25	4.75	2.65
Na2O	3.03	4.61	4.12	4.83	4.36	4.84	4.65	4.32	4.17	4.54
K2O	2.91	1.9	1.31	1.7	2.07	1.53	1.69	1.77	1.85	2.26
P2O5	0.13	0.22	0.17	0.23	0.17	0.16	0.23	0.24	0.18	0.12
LOI	1.73	1.08	1.4	0.73	1.01	0.8	1.69	1.18	1.47	0.77
Total		99.86	99.87	99.88	99.89	99.87	99.87	99.87	99.86	99.88
A/CNK	1.50587	1.49953	1.5514	1.57114	1.57348	1.61134	1.57315	1.70343	1.48839	1.57566
Mg#	45.9919	39.7472	38.9763	37.4077	37.3379	35.962	38.0895	39.7314	42.6803	36.5105
Li
Be
Sc	15.5
V	110
Cr	10.1
Co	13
Ni	8.7
Cu
Zn
Ga	16
Rb	78.8	38.56	28.74	35.64	39.16	39.7	39.12	53.57	41.37	39.44
Sr	256	280.08	373.33	251.53	289.88	249.97	375.81	288.16	401.16	215.74
Y	16.4	24.36	26.47	28.59	31.27	27.64	28	32.17	25.16	22.79
Zr	132	132.59	86.9	108.15	156.68	135.64	123.59	105.77	88.65	106.7
Nb	6.62	4.72	3.71	4.79	6.17	6.28	4.94	4.75	4.36	4.1
Cs	4.02
Ba	384	494.03	417.16	458.9	602.58	552.51	509.65	490.44	509.16	531.72
La	21.2	14.85	15.29	16.8	17.07	17.94	19.06	19.57	20	20.35
Ce	42.3	28.2	28.75	35.77	34.97	33.49	35.84	36.28	37.1	35.36
Pr	5.15	4.26	3.86	4.74	4.88	4.47	4.68	4.91	4.86	4.65
Nd	19.3	17.65	16.33	19.91	21.04	18.87	19.45	21.11	19.67	19.11
Sm	3.66	4.08	4.1	4.65	5.08	4.41	4.57	5.1	4.45	4.27
Eu	0.86	1.26	1.4	1.45	1.43	1.38	1.46	1.57	1.35	1.37
Gd	3.29	4.38	4.64	5.06	5.19	4.91	5.17	5.68	4.73	4.71
Tb	0.52	0.79	0.87	0.92	0.94	0.87	0.93	1.05	0.85	0.82
Dy	3.14	4.9	5.64	5.94	6.02	5.57	5.93	6.85	5.27	5.16
Ho	0.65	0.99	1.12	1.17	1.19	1.09	1.17	1.36	1.04	1.02
Er	1.84	2.89	3.3	3.47	3.53	3.24	3.48	3.98	3.09	3.03
Tm	0.28	0.51	0.58	0.59	0.62	0.56	0.6	0.68	0.54	0.53
Yb	1.89	3.06	3.44	3.57	3.58	3.26	3.6	3.87	3.2	3.13
Lu	0.3	0.47	0.55	0.56	0.57	0.52	0.57	0.61	0.51	0.5
Hf	4.31	3.98	3.1	3.29	4.38	3.7	3.9	3.44	3.01	3.6
Ta	0.58	0.44	0.32	0.41	0.42	0.4	0.44	0.47	0.37	0.37
Pb
Th	11.5	4.55	3.93	3.6	4.1	3.18	5.49	4.29	3.86	4.37
U	1.63	1.33	0.98	1	1.23	1.03	1.63	1.2	0.79	1.09
Sr/Y	15.6098	11.4975	14.1039	8.79783	9.27023	9.04378	13.4218	8.95741	15.9444	9.46643
Eu/Eu*	0.743563	0.906208	0.978289	0.909479	0.844254	0.903257	0.915446	0.888461	0.894157	0.930048
(La/Yb)N	7.56238	3.27182	2.99663	3.17268	3.21466	3.71013	3.56948	3.40929	4.21371	4.38334
Rb/Sr	0.307812	0.137675	0.0769828	0.141693	0.13509	0.158819	0.104095	0.185904	0.103126	0.182813
(La/Yb)N_thickness (km)	34.7379	20.4946	19.0011	19.9715	20.195	22.6319	21.9749	21.1943	24.7956	25.4665
Age(Ma)	310.59	310.59	310.59	310.59	310.59	310.8	310.8	310.8	310.8	314.8
Data sources	F. L. Yang et al., 2017	F. L. Yang et al., 2017	F. L. Yang et al., 2017	F. L. Yang et al., 2017	F. L. Yang et al., 2017	M. Li et al., 2018	M. Li et al., 2018	M. Li et al., 2018	W. B. Yang et al., 2020	J. Li et al., 2019
Rock type	quartz diorite	quartz diorite	quartz diorite	quartz diorite	quartz diorite	tonalite	tonalite	tonalite	tonalite	trondhjemite
Latitude(°N)	Pengboshan	Pengboshan	Pengboshan	Pengboshan	Pengboshan	Hazhu	Hazhu	Hazhu	Hongshishan	Yuanbaoshan
Longitude(°E)
Sample	D4314Gsl	PM028026Gsl	D4312Gsl	D4313Gsl	PM028032Gsl	2.3	2.2	2.1	D5161GS-2	P02YQ2-6
SiO2	60.74	61.29	60.34	57.52	59.58	65.4	65.08	65.97	68.08	71.89
TiO2	0.6	0.57	0.71	0.7	0.71	0.4	0.38	0.36	0.29	0.21
Al2O3	16.28	15.63	15.59	16.38	15.09	16.56	17.2	16.56	16.52	14.47
Fe2O3T	6.687	6.368	7.418	7.66	7.642	3.38	3.47	3.26	2.658	1.772
FeOT	6.05345	5.75323	6.71948	6.93335	6.89998	3.01	3.12	2.94	2.40373	1.60691
Fe2O3	2.76	3.86	2.6	3.26	5.09	1.12	1.02	1.04	1.36	0.43
FeO	3.57	2.28	4.38	4	2.32	2.03	2.2	2	1.18	1.22
MnO	0.11	0.11	0.11	0.11	0.12	0.054	0.058	0.058	0.099	0.02
MgO	3.05	3	3.22	3.48	3.73	2.58	2.85	2.5	1.02	0.99
CaO	5.55	6.42	6.15	5.72	5.79	4.92	1.07	1.91	5.08	1.68
Na2O	3.12	3.03	2.88	3.41	2.69	4.18	1.62	1.28	3.79	4.87
K2O	2.04	1.75	1.37	1.96	2.07	1.1	1.4	1.27	1	1.58
P2O5	0.16	0.17	0.13	0.18	0.17	0.095	0.1	0.098	0.065	0.07
LOI	1.91	1.76	2.4	3.12	2.51	1.33	0.76	0.72		2.5
Total									99.38
A/CNK	1.52007	1.39554	1.49904	1.47701	1.43033	1.62353	4.20538	3.713	1.67376	1.77983
Mg#	47.3163	48.173	46.0683	47.221	49.0733	60.4413	61.9523	60.2506	43.0654	52.3401
Li	19.2	20.73	18.79	25.71	27.3
Be
Sc						9.14	9.53	10.2	6.35
V	151.47	154.53	151.02	188.19	189.27	53.4	55.1	52.7	39.65
Cr						42.7	50.3	15.6	8.22
Co						10.9	12.4	11	4.15
Ni	13.62	12.91	10.41	15.65	18.09	45	52.5	45.6	3.12
Cu
Zn
Ga						14.5	14.7	15	15.61
Rb	84.75	85.36	50.71	82.84	72.9	43.4	57.5	50	31.46	44.84
Sr	427.68	364.32	241.47	427.59	389.97	315	356	296	297.44	133.2
Y	25.29	24.39	22.527	37.458	32.544	10.3	12.1	12.2	6.34	3.76
Zr	162.83	189.45	134.93	90.88	166.98	109	104	113	87.69	91.54
Nb	7.46	7.91	6.46	7.72	9.02	3.21	2.83	3.26	3.27	1.37
Cs						2.66	3.37	3.36	1.89
Ba						118	127	111	331.98	338.63
La	12.72	13.06	14.05	24.72	29.44	8.9	9.29	9.75	18.84	5.72
Ce	31.79	32.59	30.99	56.97	61.98	15.4	17.3	17.1	30.67	12.7
Pr	4.78	4.87	4.18	7.97	7.97	2.31	2.42	2.46	3.56	1.67
Nd	21.31	21.23	17.13	32.99	32.21	8.84	9.67	9.73	12.22	7.11
Sm	4.92	4.7	3.63	7.58	6.9	1.9	2.3	2.25	2.01	1.56
Eu	1.15	1.11	1.08	1.28	1.38	0.55	0.59	0.58	1.03	0.48
Gd	4.13	3.97	3.35	6.33	5.76	2.02	2.25	2.3	1.54	1.31
Tb	0.8	0.77	0.68	1.22	1.06	0.31	0.36	0.36	0.22	0.2
Dy	4.64	4.43	4.13	7.01	6.07	1.78	2.08	1.97	1.21	0.89
Ho	0.96	0.9	0.83	1.4	1.22	0.34	0.4	0.38	0.24	0.13
Er	2.81	2.74	2.57	4.18	3.59	0.95	1.11	1.08	0.66	0.34
Tm	0.44	0.44	0.43	0.63	0.55	0.15	0.17	0.16	0.11	0.04
Yb	2.9	2.92	2.82	4.01	3.78	0.97	1.11	1.07	0.8	0.25
Lu	0.46	0.44	0.42	0.61	0.56	0.15	0.18	0.16	0.13	0.07
Hf	9.14	12.73	8.15	5.49	9.76	2.98	2.9	2.78	1.93	4.86
Ta	0.61	0.72	0.51	0.6	0.68	0.28	0.26	0.26	0.46	0.14
Pb
Th	11.05	9.75	3.55	13.44	15.42	4.23	3.61	3.88	4.46	1.08
U	3.24	2.31	1.08	2.27	2	0.47	0.51	0.46	0.63
Sr/Y	16.911	14.9373	10.7191	11.4152	11.9829	30.5825	29.4215	24.2623	46.9148	35.4255
Eu/Eu*	0.759957	0.766003	0.931474	0.550132	0.651656	0.853112	0.783826	0.772932	1.72437	1.00025
(La/Yb)N	2.95715	3.0154	3.35901	4.15613	5.25086	6.1859	5.64257	6.14335	15.8773	15.4255
Rb/Sr	0.198162	0.2343	0.210005	0.193737	0.186937	0.137778	0.161517	0.168919	0.105769	0.336637
(La/Yb)N_thickness (km)	18.7756	19.1072	20.9417	24.5617	28.5364	31.3224	29.7595	31.205	47.3468	46.8562
Age(Ma)	314.8	314.8	314.8	315.6	317.1	317.1	320	323.6	323.6	334.8
Data sources	J. Li et al., 2019	J. Li et al., 2019	J. Li et al., 2019	W. B. Yang et al., 2020	J. Li et al., 2019	J. Li et al., 2019	Z. Y. Hao et al., 2020	Y. Tian et al., 2020	Y. Tian et al., 2020	X. C. Sun et al., 2021
Rock type	trondhjemite	trondhjemite	trondhjemite	granodiorite	granodiorite	granodiorite	monzogranite	granodiorite	granodiorite	granodiorite
Latitude(°N)	Yuanbaoshan	Yuanbaoshan	Yuanbaoshan	Hongshishan	Yuanbaoshan	Yuanbaoshan	Fengleishan	N. Pengboshan	N. Pengboshan	Shuangfengshan
Longitude(°E)
Sample	P02YQ2-3	P02YQ4-2	P02YQ4-1	D5300GS-1	P02YQ1-2	P02YQ1-3	6110	P06YQ1-1	P06YQ3-1	SF-3
SiO2	67.79	68.54	69.05	69.74	67.84	67.77	71.46	69.12	68.56	60.37
TiO2	0.32	0.31	0.28	0.22	0.46	0.49	0.37	0.41	0.49	0.72
Al2O3	16.4	16.36	16.24	15.78	15.01	14.94	14.15	15.3	15.14	16.34
Fe2O3T	2.714	2.583	2.445	2.172	4.034	4.263	2.617	3.229	3.556	5.27
FeOT	2.45575	2.33369	2.21176	1.96275	3.65371	3.85864	2.36571	2.92273	3.21359	4.74195
Fe2O3	1.24	1.56	1.18	1.27	1.46	1.81	1.44	1.37	2.06
FeO	1.34	0.93	1.15	0.82	2.34	2.23	1.07	1.69	1.36
MnO	0.07	0.06	0.06	0.06	0.08	0.09	0.095	0.063	0.089	0.09
MgO	0.98	0.97	0.83	0.59	1.18	1.24	0.9	1.2	1.38	2.33
CaO	3.67	3.32	3.54	3.66	3.05	3.35	2.24	3.23	2.65	5.4
Na2O	5.01	4.74	4.94	3.6	4.14	3.9	4.09	4.16	4.09	6.35
K2O	1.21	1.5	1.05	2.41	2.22	2.33	2.64	2.4	2.59	1.76
P2O5	0.11	0.1	0.1	0.094	0.11	0.11	0.124	0.111	0.121	0.16
LOI	1.75	1.47	1.45		1.98	1.6	1.29	0.83	1.31	1.17
Total				99.32			99.87			99.96
A/CNK	1.65824	1.7113	1.70409	1.63185	1.59511	1.5595	1.57748	1.56282	1.62272	1.20947
Mg#	41.5664	42.5589	40.0812	34.8886	36.5356	36.4203	40.4102	42.2588	43.3578	46.6913
Li
Be
Sc				6.37
V				22.06
Cr				14.68
Co				3.81
Ni				2.27
Cu
Zn
Ga				15.21						18.7
Rb	10.74	24.9	7.94	79.92	41.68	47.91	72.4	99.9	77.1	63.5
Sr	364.5	395.5	341.7	269.67	160.1	170.4	281.5	345	283	283
Y	8.72	8.09	11.9	10.64	32.3	37.7	17.67	13.73	18.24	20.2
Zr	108.1	103.61	100.57	94.9	158.35	169.07	156.8	148	160	151
Nb	4.26	4.11	3.75	7.17	6.25	6.42	8.9	7.04	5.45	10.9
Cs				3.37			1.39			1.26
Ba	381.78	559.34	401.84	386.76	619.82	629.06	625.6	753	740	347
La	10.6	10.6	11.6	14.28	17.2	20.9	26.06	15.17	15.61	10.8
Ce	21.5	20.7	23.6	29.55	38.7	45.3	51.31	27.86	30.4	25.9
Pr	2.83	2.68	3.19	3.21	5.1	6.2	5.77	3.44	3.99	3.62
Nd	11.2	10.8	13	10.64	21.8	26.1	20.82	13.38	15.91	16
Sm	2.18	1.97	2.71	2.26	5.06	5.99	3.81	2.58	3.34	3.6
Eu	0.55	0.54	0.72	0.74	1	1.11	1.04	0.77	1.02	1.1
Gd	1.88	1.8	2.24	1.97	4.72	5.45	3.4	2.39	3.12	3.54
Tb	0.3	0.28	0.37	0.34	0.92	1.07	0.5	0.4	0.56	0.6
Dy	1.6	1.53	2.14	1.92	5.74	6.8	2.81	2.38	3.34	3.58
Ho	0.31	0.3	0.42	0.37	1.2	1.37	0.58	0.48	0.66	0.71
Er	0.92	0.91	1.25	1.08	3.47	4.15	1.77	1.46	1.98	2.09
Tm	0.14	0.14	0.2	0.17	0.56	0.69	0.32	0.24	0.33	0.34
Yb	0.93	0.91	1.26	1	3.73	4.82	2.12	1.65	2.2	2.09
Lu	0.14	0.14	0.19	0.16	0.55	0.62	0.34	0.28	0.33	0.33
Hf	7.16	6.91	6.71	3.7	7.48	10.6	6.06	5.81	6.86	3.67
Ta	0.27	0.32	0.31	1.07	0.48	0.47	0.65	0.62	0.39	0.79
Pb										7.12
Th	2.63	3.52	2.81	7.91	7.05	6.69	8.85	10.3	6.63	3.67
U				0.51			1.47	2.25	1.19	0.59
Sr/Y	41.8005	48.8875	28.7143	25.3449	4.95666	4.51989	15.931	25.1275	15.5154	14.0099
Eu/Eu*	0.811685	0.861691	0.868968	1.04898	0.616012	0.583536	0.866327	0.932935	0.951347	0.931604
(La/Yb)N	7.68436	7.85324	6.20686	9.62748	3.10888	2.92337	8.28749	6.19849	4.78371	3.48387
Rb/Sr	0.029465	0.0629583	0.0232368	0.296362	0.260337	0.281162	0.257194	0.289565	0.272438	0.224382
(La/Yb)N_thickness (km)	35.0099	35.3795	31.3799	38.8423	19.6262	18.5803	36.2944	31.3569	26.9524	21.5622
Age(Ma)	334.8	334.8	334.8	334.8	334.8	334.8	334.8	348.5	348.5	348.5
Data sources	X. C. Sun et al., 2021	X. C. Sun et al., 2021	X. C. Sun et al., 2021	X. C. Sun et al., 2021	X. C. Sun et al., 2021	X. C. Sun et al., 2021	X. C. Sun et al., 2021	D. F. Song et al., 2013b	D. F. Song et al., 2013b	Z. N. Zhao et al., 2020
Rock type	granodiorite	granodiorite	granodiorite	granodiorite	granodiorite	granodiorite	granodiorite	foliated granite	foliated granite	granodiorite
Latitude(°N)	Shuangfengshan	Shuangfengshan	Shuangfengshan	Shuangfengshan	Shuangfengshan	Shuangfengshan	Shuangfengshan	Shibanjing	Shibanjing	Baiyunshan
Longitude(°E)
Sample	SF-1	SF-6	SF-2	SF-8	SF-5	SF-4	SF-7	11SBJ02-3	11SBJ02-2	P16YQ7
SiO2	63.79	60.71	61.72	60.93	55.42	65.53	61.85	67.75	67.09	66.98
TiO2	0.55	0.64	0.66	0.66	0.87	0.51	0.66	0.45	0.45	0.54
Al2O3	15.34	16.37	15.87	16.31	17.53	14.84	15.89	15.54	16	15.72
Fe2O3T	4.39	4.81	5.12	4.92	6.43	4.15	4.91	3.26	3.46	3.654
FeOT	3.95012	4.32804	4.60698	4.42702	5.78571	3.73417	4.41802	2.93335	3.11331	3.30565
Fe2O3										1.74
FeO										1.74
MnO	0.09	0.08	0.08	0.09	0.12	0.07	0.08	0.06	0.06	0.078
MgO	1.81	2.55	2.34	2.47	3.13	1.51	2.36	1.56	1.56	1.94
CaO	4.47	5.36	5.06	5.55	6.96	3.91	5.04	3.7	3.91	3.71
Na2O	6.58	6.49	6.46	6.37	6.34	6.43	6.33	3.91	4.12	4.07
K2O	1.74	1.11	1.46	1.05	1.15	1.87	1.54	2.42	2	2.35
P2O5	0.12	0.14	0.15	0.15	0.22	0.13	0.15	0.13	0.15	0.16
LOI	0.84	1.72	0.79	1.41	1.45	0.73	1.23	0.58	0.46	0.42
Total	99.73	100	99.72	99.91	99.61	99.67	100.03	99.36	99.26	99.03
A/CNK	1.19937	1.26312	1.22265	1.25752	1.21315	1.2154	1.23083	1.54935	1.59521	1.55183
Mg#	44.9576	51.2251	47.5174	49.8632	49.092	41.8878	48.7754	48.6648	47.1789	51.1271
Li
Be
Sc
V										57.6
Cr								17.4	17.8	30
Co
Ni								8.39	9.06	11.4
Cu
Zn
Ga	17.6	17.8	18.1	18.6	19.7	17.4	18.2
Rb	73.4	33.9	52	32.7	41	67.4	48.5	47.3	53.2	50.6
Sr	238	291	285	320	370	232	308	463	496	548
Y	20.5	18.3	18.5	19.1	20.2	18.4	19.4	17.8	11.7	16.5
Zr	156	165	143	157	114	135	222	108	164	132
Nb	10.2	7.08	9.72	7.91	9.6	10.4	10.1	9.09	7.27	9.71
Cs	1.95	0.74	1.41	0.96	0.88	1.31	1.17			0.92
Ba	331	209	346	275	227	458	367	588	393	621
La	12.4	13.3	14	14.2	16.7	18.1	24.8	21.9	24.6	25.5
Ce	26.4	30.8	30.3	32	35.7	34.6	46.9	45.6	48.4	55.3
Pr	3.45	3.71	3.87	3.96	4.47	4.12	5.2	5.67	5.12	6.79
Nd	14.8	15.4	16.2	16.1	18.6	16.1	19.7	22.1	18.6	27.3
Sm	3.4	3.29	3.47	3.41	3.88	3.24	3.73	4.28	3.2	4.39
Eu	0.98	0.99	1.03	1.05	1.26	1.03	1.07	1.04	0.89	1.24
Gd	3.37	3.28	3.39	3.48	3.92	3.24	3.75	3.79	2.93	3.95
Tb	0.59	0.55	0.56	0.57	0.65	0.54	0.59	0.59	0.41	0.55
Dy	3.54	3.23	3.28	3.37	3.72	3.17	3.43	3.34	2.17	2.98
Ho	0.72	0.66	0.66	0.68	0.74	0.64	0.7	0.67	0.43	0.6
Er	2.11	1.9	1.93	2	2.09	1.9	2.04	1.83	1.19	1.78
Tm	0.34	0.3	0.3	0.31	0.32	0.31	0.32	0.28	0.19	0.29
Yb	2.19	1.87	1.94	1.99	1.99	1.94	2.03	1.81	1.24	1.72
Lu	0.35	0.3	0.31	0.31	0.3	0.31	0.32	0.28	0.2	0.3
Hf	4	4.05	3.69	3.96	2.76	3.61	5.41	3.22	4.95	4
Ta	0.83	0.59	0.71	0.6	0.63	0.68	0.63	1.03	0.6	0.87
Pb	9.56	6.11	6.3	6.19	6.4	7.64	6.53	14.5	13.1
Th	5	3.51	4.06	4.79	3.37	6.02	5.93	7.18	6.29	5.37
U	0.66	0.81	0.54	1.13	0.72	0.62	0.68	1.46	1.46	1.24
Sr/Y	11.6098	15.9016	15.4054	16.7539	18.3168	12.6087	15.8763	26.0112	42.3932	33.2121
Eu/Eu*	0.875825	0.912069	0.907509	0.92394	0.978681	0.962306	0.866357	0.773588	0.873559	0.893488
(La/Yb)N	3.81735	4.79507	4.86531	4.81083	5.65781	6.29016	8.23645	8.15737	13.3751	9.99531
Rb/Sr	0.308403	0.116495	0.182456	0.102188	0.110811	0.290517	0.157468	0.10216	0.107258	0.0923358
(La/Yb)N_thickness (km)	23.1162	26.9927	27.24	27.0485	29.8054	31.6065	36.1894	36.0254	44.4315	39.4797
Age(Ma)	348.5	350.8	350.8	350.8	350.8	350.8	355	356	356	356
Data sources	Z. N. Zhao et al., 2020	L. F. Duan et al., 2020	L. F. Duan et al., 2020	L. F. Duan et al., 2020	L. F. Duan et al., 2020	L. F. Duan et al., 2020	Y. Q. Yang et al., 2013	W. Zhang, 2013	W. Zhang, 2013	W. Zhang, 2013
Rock type	granodiorite	quartz diorite	quartz diorite	quartz diorite	quartz diorite	quartz diorite	granite	granodiorite	monzodiorite	monzodiorite
Latitude(°N)	Baiyunshan	Baiheshan	Baiheshan	Baiheshan	Baiheshan	Baiheshan	Dongqiyishan	Dongqiyishan	Dongqiyishan	Dongqiyishan
Longitude(°E)
Sample	P16YQ6	YQ1024-1-4	YQ1024-1-3	YQ1024-1-2	YQ1024-1-1	YQ1024-1-5	DQ4-4	W08-297	W08-294	W08-298
SiO2	65.5	65.93	66.3	64.37	65.77	65.02	71.2	67.65	67.62	63.17
TiO2	0.58	0.51	0.53	0.66	0.54	0.54	0.29	0.29	0.25	0.49
Al2O3	16.37	17.18	16.97	17.21	17.04	17.3	14.4	15.56	15.85	16.78
Fe2O3T	4.034	3.298	3.443	4.235	3.523	3.598	2.308	2.37	1.77	3.85
FeOT	3.64758	2.98267	3.11263	3.8316	3.18461	3.25158	2.08982	2.13253	1.59265	3.46423
Fe2O3	2.12	1.67	1.87	1.98	1.95	2.08	0.9
FeO	1.74	1.48	1.43	2.05	1.43	1.38	1.28
MnO	0.079	0.08	0.085	0.086	0.076	0.09	0.03	0.04	0.04	0.06
MgO	2.22	0.92	1.01	1.42	1.01	1.05	0.72	2.49	2.09	2.43
CaO	4.34	4.26	4.08	4.81	4	4.5	1.58	2.56	2.19	4.3
Na2O	4.25	4.68	4.76	4.34	4.92	4.76	4.57	5.42	5.15	4.86
K2O	1.91	2.28	1.84	1.69	1.96	1.9	2.8	1.8	4.01	2.27
P2O5	0.16	0.14	0.14	0.19	0.15	0.2	0.08	0.11	0.09	0.15
LOI	0.7	0.72	0.83	0.97	1.01	1.02	1.69	1.59	0.83	1.52
Total	99.27	99.85	99.85	99.78	99.86	99.84		99.89	99.89	99.89
A/CNK	1.55905	1.53119	1.58895	1.58764	1.56618	1.55018	1.60894	1.591	1.39648	1.46807
Mg#	52.0359	35.4764	36.6449	39.7812	36.1158	36.5327	38.0472	67.5466	70.0526	55.5628
Li							8.01
Be
Sc		11.7	11.5	12.7	12.1	12.5	4.07
V	61.6	45.2	48.6	62.8	47.1	50.9		55.2	24.4	56.2
Cr	30	2.44	2.6	7.93	2.11	6.31
Co		4.15	4.55	6.04	4.72	4.9
Ni	14.4	2.06	2.2	5.54	2.12	3.6
Cu
Zn
Ga		21.3	19.9	17.5	19.5	21.2	16.7	20	16	20
Rb	38.3	37.2	37.5	76.4	56.7	50.6	76.3	51	63	43
Sr	616	288	276	321	274	328	235	658	374	528
Y	12.3	24.7	26.3	27	26.4	25.1	15	13.6	6.8	11
Zr	154	287	279	273	297	313	148	154	113	116
Nb	6.73	8.01	8.54	8.48	8.32	8.04	4.94	4	4.9	7.3
Cs	1.3	2.52	2.18	4.92	2.66	2.86
Ba	495	519	467	333	394	530	388	450	564	498
La	26.9	17.1	17.9	19.5	19.6	22.4	22.6	17.8	18	19.5
Ce	52.1	42.2	40.5	46.7	47	50.9	43.3	37	36	38
Pr	6.2	4.39	4.68	5.53	5.04	5.47	4.92	3.6	4	4.4
Nd	23.9	17	18.6	22.5	20	21.4	17.9	14.2	15.3	16.4
Sm	3.86	3.91	4.13	5.11	4.34	4.54	3.4	2.42	2.78	2.78
Eu	1.34	1.26	1.22	1.41	1.29	1.36	0.62	0.77	0.75	0.99
Gd	3.03	3.8	4.03	4.76	4.26	4.32	3.39	2.16	2.02	2.52
Tb	0.48	0.7	0.75	0.84	0.77	0.77	0.47	0.44	0.29	0.41
Dy	2.2	4.32	4.63	4.98	4.76	4.57	2.82	2.58	1.45	1.94
Ho	0.42	0.91	0.96	1	0.97	0.93	0.56	0.46	0.23	0.38
Er	1.14	2.71	2.84	2.88	2.87	2.77	1.68	1.43	0.67	1.03
Tm	0.22	0.42	0.45	0.45	0.45	0.44	0.25	0.23	0.13	0.18
Yb	1.21	2.82	3	2.8	2.96	2.87	1.78	1.52	0.76	1.18
Lu	0.22	0.45	0.48	0.44	0.48	0.46	0.26	0.23	0.12	0.16
Hf	4.38	7.65	7.59	7.33	7.93	8.39	3.46	3.92	2.54	2.72
Ta	0.37	0.66	0.74	0.62	0.66	0.64	0.52	0.4	0.2	0.4
Pb								21.6	22.6	28.2
Th	4.81	8.14	9.48	8.9	8.72	9.08	9.19	5	3.5	5
U	1.18	1.5	2.27	2.76	2.09	2.1	1.8	1.27	0.6	1.06
Sr/Y	50.0813	11.6599	10.4943	11.8889	10.3788	13.0677	15.6667	48.3824	55	48
Eu/Eu*	1.15777	0.987404	0.90359	0.860573	0.906929	0.926059	0.552692	1.00975	0.925304	1.1231
(La/Yb)N	14.9883	4.08819	4.02269	4.69528	4.46425	5.262	8.55999	7.89516	15.9677	11.1413
Rb/Sr	0.0621753	0.129167	0.13587	0.238006	0.206934	0.154268	0.324681	0.0775076	0.168449	0.0814394
(La/Yb)N_thickness (km)	46.3673	24.2815	24.0069	26.6352	25.7775	28.5724	36.8444	35.47	47.4434	41.325
Age(Ma)	356	356	360	360	361	361	362	362	362	362
Data sources	W. Zhang, 2013	W. Zhang, 2013	Y. X. Wang et al., 2014	Y. X. Wang et al., 2014	Y. Zhao et al., 2017	Y. Zhao et al., 2017	Y. Zhao et al., 2017	Y. Zhao et al., 2017	Y. Zhao et al., 2017	Y. Zhao et al., 2017
Rock type	granodiorite	granodiorite	genissic quartz diorite	tonalite	granodiorite	granodiorite	granite	granite	granite	granite
Latitude(°N)	Dongqiyishan	Dongqiyishan	Shibanjing	Shibanjing	Dunhuang	Dunhuang	Dunhuang	Dunhuang	Dunhuang	Dunhuang
Longitude(°E)
Sample	W08-291	W08-303	3	5	1305YLH05	1305YLH05	1307HYS07	1307HYS07	1307HYS07	1307HYS07
SiO2	71.76	67	71.6	67.36	69.08	69.15	70.94	71.16	69.98	70.59
TiO2	0.15	0.5	0.25	0.5	0.28	0.28	0.22	0.22	0.22	0.24
Al2O3	14.82	15.87	14.96	16.05	16.19	16.03	13.39	13.48	14.03	12.95
Fe2O3T	1.37	3.21	3.102	3.438	2.37	2.39	1.7	1.73	1.78	1.72
FeOT	1.23273	2.88836	2.82	3.11068	2.13253	2.15052	1.52966	1.55665	1.60164	1.54766
Fe2O3			0	1.59
FeO			2.82	1.68
MnO	0.04	0.06	0.11	0.07	0.04	0.04	0.03	0.03	0.03	0.04
MgO	1.22	1.79	0.93	1.69	1.14	1.15	0.76	0.76	0.76	0.75
CaO	1.47	3.52	3.02	4.32	4.25	4.28	2.5	2.5	2.71	3.13
Na2O	4.53	4.54	1.74	4.23	4.24	4.33	4.75	4.72	4.9	4.66
K2O	3.44	2.47	4.19	1.96	0.99	1.02	2.53	2.51	2.4	2.09
P2O5	0.05	0.14	0.038	0.16	0.1	0.1	0.07	0.07	0.07	0.07
LOI	1.05	0.77	1.24	1.12	0.82	0.82	2.78	2.78	3.21	3.29
Total	99.89	99.87	100.9	100.73	99.5	99.59	99.67	99.96	100.09	99.53
A/CNK	1.56992	1.50712	1.67151	1.52712	1.70781	1.66459	1.36912	1.38541	1.4016	1.31073
Mg#	63.8223	52.487	37.022	49.1981	48.7942	48.8024	46.9676	46.5321	45.824	46.3468
Li					10.2	9.92	2.4	2.45	2.7	2.52
Be					1.02	1.01	1.19	1.21	1.22	1.05
Sc					4.36	4.42	3.56	3.64	3.8	3.89
V	27.2	45.8			28	28.2	20.9	21.3	23.5	22.1
Cr					10.8	14.6	14.8	15	15.2	21
Co					36.6	34.7	23.2	23.5	22.6	24.9
Ni					4.92	6.37	8.36	8.57	8.62	11.3
Cu					1.15	1.16	9.79	9.98	6.41	9.98
Zn					38.1	38	35	36	33.8	33.7
Ga	17	19			16.9	16.8	14.5	14.9	15.8	13.8
Rb	88	61	40.6	45.6	36.9	37.4	68.8	70.7	63.5	62.2
Sr	272	470	436	629	296	294	261	264	332	277
Y	9.6	16.1	10.6	13.1	6.12	6.13	6.47	6.47	7.73	7.04
Zr	129	81	114	103	96.8	96.6	110	102	110	108
Nb	7.4	8	3.4	8.4	4.18	4.15	3.73	3.75	3.85	3.83
Cs					1.57	1.6	1.15	1.18	1.1	1.11
Ba	846	526	540	527	223	225	465	475	425	408
La	22	27.2	20.3	21.1	9.91	9.98	14.1	14.5	14.6	15.8
Ce	42	57	2.4	42.7	18.4	18.5	26.5	27.3	27.3	29.2
Pr	4.4	6.1	8.85	5.46	2.07	2.09	2.96	3.06	3.05	3.25
Nd	16.8	24	1.7	23.8	7.91	7.95	11.1	11.3	11.3	11.9
Sm	2.4	4.48	0.75	4.35	1.54	1.52	2.01	2.1	2.17	2.17
Eu	0.8	1.11	1.45	1.22	0.52	0.51	0.51	0.52	0.6	0.57
Gd	2.3	3.92	0.22	3.53	1.4	1.38	1.73	1.75	1.86	1.82
Tb	0.33	0.6	1.21	0.46	0.19	0.19	0.22	0.22	0.25	0.23
Dy	1.68	3.26	0.25	2.52	1.06	1.06	1.15	1.16	1.34	1.23
Ho	0.32	0.6	0.73	0.46	0.21	0.2	0.21	0.21	0.24	0.23
Er	0.93	1.81	0.11	1.34	0.58	0.59	0.6	0.59	0.68	0.64
Tm	0.13	0.28	0.8	0.2	0.091	0.089	0.089	0.085	0.097	0.094
Yb	0.9	1.8	0.11	1.19	0.6	0.6	0.55	0.54	0.61	0.59
Lu	0.14	0.25	6.86	0.17	0.094	0.094	0.085	0.083	0.091	0.089
Hf	3.16	2.79	2.84	3.84	2.33	2.29	2.79	2.61	2.71	2.72
Ta	0.5	0.7	0.32	0.63	0.35	0.36	0.44	0.44	0.42	0.43
Pb	30	15.4			8.51	8.48	12.5	12.8	14.2	11.7
Th	4.3	8.9	2.75	4.7	2.33	2.29	8.27	8.36	8.35	8.19
U	1.08	1.62	0.73	0.94	0.75	0.83	1.89	1.9	2.13	2.01
Sr/Y	28.3333	29.1925	41.1321	48.0153	48.366	47.9608	40.34	40.8037	42.9495	39.3466
Eu/Eu*	1.02741	0.792561	8.40276	0.923762	1.06366	1.05749	0.81694	0.807353	0.891689	0.85431
(La/Yb)N	16.4803	10.1878	124.419	11.9542	11.1354	11.2141	17.2839	18.1033	16.1364	18.0547
Rb/Sr	0.323529	0.129787	0.0931193	0.072496	0.124662	0.127211	0.263602	0.267803	0.191265	0.224549
(La/Yb)N_thickness (km)	47.9805	39.804	82.3459	42.5221	41.316	41.4356	48.7899	49.5774	47.6221	49.5316
Age(Ma)	362.6	362.6	362.6	362.6	363	363.4	363.8	363.8	363.8	363.8
Data sources	X. Y. Wang et al., 2018b	X. Y. Wang et al., 2018b	X. Y. Wang et al., 2018b	X. Y. Wang et al., 2018b	Y. Zhao et al., 2017	X. Y. Wang et al., 2018b	Z. N. Zhao et al., 2020	Z. N. Zhao et al., 2020	Z. N. Zhao et al., 2020	Z. N. Zhao et al., 2020
Rock type	Bt-granite	Bt-granite	Bt-granite	Bt-granite	monzodiorite	Bt-granodiorite	granodiorite	granodiorite	granodiorite	granodiorite
Latitude(°N)	Shibanjing	Shibanjing	Shibanjing	Shibanjing	Dunhuang	Jianshan	Baiyunshan	Baiyunshan	Baiyunshan	Baiyunshan
Longitude(°E)
Sample	12SB11	12SB08	12SB09	12SB10	33SX-2	12SB04	P16YQ2	P16YQ1	P16YQ3	P16YQ4
SiO2	69.7	69.5	69.7	69.8	55.29	65.7	63.46	67.68	66.84	66.16
TiO2	0.36	0.41	0.39	0.38	1.08	0.52	0.77	0.53	0.54	0.48
Al2O3	15.7	15.6	15.6	15.5	19.47	16.7	15.42	14.27	15.52	16.42
Fe2O3T	2.46	2.73	2.62	2.64	7.22	3.64	5.007	4.249	3.577	3.498
FeOT	2.21351	2.45645	2.35748	2.37547	6.49656	3.27527	4.53156	3.84563	3.23667	3.16365
Fe2O3							2.18	1.84	1.63	1.76
FeO							2.57	2.19	1.77	1.58
MnO	0.05	0.06	0.06	0.06	0.09	0.07	0.097	0.075	0.078	0.066
MgO	0.78	0.9	0.85	0.84	2.67	1.58	2.79	2.51	1.75	1.87
CaO	2.56	2.61	2.47	2.6	6.46	4.05	4.54	4.01	3.93	4.3
Na2O	4.12	4.11	4.14	4.17	4.74	4.47	3.78	3.41	4.05	4.2
K2O	3.03	2.49	2.46	2.59	1.59	1.8	1.49	2.07	2.04	1.94
P2O5	0.09	0.1	0.1	0.1	0.43	0.15	0.2	0.16	0.17	0.16
LOI	0.67	0.93	1.13	0.9	0.81	0.82	0.86	1.38	0.65	0.79
Total	99.5	99.5	99.5	99.5	99.85	99.5	97.23	98.67	98.32	98.94
A/CNK	1.61689	1.69381	1.71996	1.65598	1.52228	1.61822	1.57187	1.50369	1.5489	1.5728
Mg#	38.58	39.5072	39.1247	38.6627	42.2832	46.2337	52.3236	53.7773	49.0778	51.3059
Li					16.3
Be					1.94
Sc	3.97	4.49	4.58	4.15	9.55	6.83
V	19.9	24	21.2	22.2	83.7	44.7	87.3	70	52	50.7
Cr	5.89	18.9	10.7	12.7	54.1	17.1	35.5	77.5	26.2	26.4
Co	3.25	3.58	3.47	3.39	40.3	7.02
Ni	1.36	1.57	1.46	1.59	33.2	4.55	15.6	22.7	11.7	12.6
Cu	2.2	2.34	2.15	2.94	17.2	3.54
Zn	42.9	47.1	45.6	45	82.7	57.7
Ga	17.4	17.3	17.7	17	23.4	20.1
Rb	80	72	72.1	73.5	14.6	33.3	38.2	58.6	50	40
Sr	370	353	343	349	963	669	516	418	513	580
Y	9.68	10.07	9.64	9.82	22.7	11.15	14.1	12.6	15.4	12.6
Zr	131	130	132	139	295	108	163	188	140	138
Nb	5.3	5.57	5.53	5.44	14	5.05	10.2	11.4	9.63	7.68
Cs	1.42	1.6	1.64	1.58	0.53	1.89	1.75	1.25	1.56	1.6
Ba	1004	688	683	703	759	425	373	436	549	510
La	14	15.3	16.3	17.8	56.4	10.9	22.1	23.5	24.6	25.3
Ce	28.2	32.2	32.1	35.6	102	24.3	43.7	43.6	47	48.3
Pr	3.23	3.61	3.77	4.16	11	3.34	5.47	5.26	5.84	5.6
Nd	11.9	13.3	14.2	14.8	40.2	13.9	21.1	19.2	22.9	21.1
Sm	2.27	2.42	2.46	2.59	6.44	2.93	3.76	3.58	3.86	3.74
Eu	0.86	0.84	0.84	0.84	1.54	0.96	1.22	1.03	1.16	1.04
Gd	2.09	2.18	2.25	2.18	5.49	2.59	3.13	2.89	3.4	2.96
Tb	0.31	0.32	0.33	0.32	0.73	0.38	0.47	0.43	0.55	0.46
Dy	1.7	1.76	1.78	1.74	4.15	2.02	2.39	2.18	2.75	2.34
Ho	0.34	0.36	0.36	0.35	0.79	0.4	0.5	0.44	0.58	0.45
Er	0.93	0.96	0.96	0.95	2.27	1.04	1.41	1.37	1.75	1.22
Tm	0.14	0.14	0.14	0.14	0.32	0.15	0.23	0.22	0.26	0.19
Yb	0.92	0.91	0.91	0.9	2	1.01	1.52	1.47	1.66	1.29
Lu	0.14	0.14	0.14	0.14	0.3	0.16	0.28	0.23	0.28	0.22
Hf	3.17	3.13	3.3	3.38	5.94	2.74	4.56	5.68	4.18	3.95
Ta	0.38	0.36	0.38	0.34	0.55	0.38	0.53	0.98	0.64	0.95
Pb	14.5	13.4	13.8	14.4	11.6	9.52
Th	4.49	3.92	3.78	4.65	5.04	2.59	8.76	13.2	6.92	5.49
U	0.81	1.29	0.9	1.39	0.42	0.84	2.13	2.43	1.56	1.44
Sr/Y	38.2231	35.0546	35.5809	35.5397	42.4229	60	36.5957	33.1746	33.3117	46.0317
Eu/Eu*	1.18725	1.09746	1.07297	1.05337	0.772829	1.04383	1.05835	0.949519	0.958762	0.924571
(La/Yb)N	10.2595	11.3353	12.0762	13.3341	19.0123	7.27595	9.80242	10.7779	9.99106	13.2226
Rb/Sr	0.216216	0.203966	0.210204	0.210602	0.015161	0.0497758	0.074031	0.140191	0.0974659	0.0689655
(La/Yb)N_thickness (km)	39.9232	41.6185	42.6948	44.3792	50.4102	34.0815	39.1484	40.7612	39.4725	44.2364
Age(Ma)	373.7	373.7	373.7	373.7	373.7	373.7	373.7	373.7	373.7	373.7
Data sources	Q. G. Mao et al., 2012a	Q. G. Mao et al., 2012a	Q. G. Mao et al., 2012a	Q. G. Mao et al., 2012a	Q. G. Mao et al., 2012a	Q. G. Mao et al., 2012a	Q. G. Mao et al., 2012a	Q. G. Mao et al., 2012a	Q. G. Mao et al., 2012a	Q. G. Mao et al., 2012a
Rock type	granite	granite	granite	granite	granite	granite	granite	granite	granite	granite
Latitude(°N)	Liuyuan	Liuyuan	Liuyuan	Liuyuan	Liuyuan	Liuyuan	Liuyuan	Liuyuan	Liuyuan	Liuyuan
Longitude(°E)
Sample	08L02	06LY03-1	08L01	08L09	08L15	08L06	08L14	08LY03-06	08LY03-04	08LY03-03
SiO2	65.75	66.12	66.06	65.65	66.08	67.05	66.48	65.99	65.55	65.26
TiO2	0.41	0.47	0.39	0.47	0.42	0.4	0.44	0.44	0.49	0.5
Al2O3	15.38	16.51	15.84	15.42	15.63	15.06	15.65	15.38	15.38	15.55
Fe2O3T	2.76	2.53	2.83	3.05	3.02	2.83	2.95	2.94	3.1	3.05
FeOT	2.48345	2.27649	2.54643	2.74439	2.7174	2.54643	2.65441	2.64541	2.78938	2.74439
Fe2O3
FeO	1.6		1.7	2.25	2.1	1.9	1.9	2.4	2.2	1.75
MnO	0.04	0.03	0.04	0.04	0.04	0.04	0.04	0.04	0.05	0.04
MgO	1.54	1.7	1.59	1.97	1.55	1.82	1.57	1.91	1.93	1.92
CaO	2.97	2.87	2.71	3.01	3.25	3.4	2.56	2.95	2.87	3.04
Na2O	5.32	5.13	4.98	5.62	5.74	5.46	5.96	5.61	5.65	5.92
K2O	1.86	1.99	2.15	1.98	1.79	1.5	1.91	1.93	1.99	1.98
P2O5	0.17	0.15	0.17	0.21	0.17	0.16	0.18	0.17	0.18	0.19
LOI	3.42	2.08	2.83	2.17	1.94	1.89	1.91	2.24	2.43	2.18
Total	101.22	99.58	101.29	101.84	101.73	101.51	101.55	102	101.82	101.38
A/CNK	1.51527	1.65265	1.60976	1.45335	1.44991	1.45367	1.50048	1.46616	1.46337	1.42139
Mg#	52.5022	57.1023	52.6744	56.1318	50.4154	56.0251	51.3219	56.2746	55.2243	55.4978
Li
Be
Sc
V	49.1		47	43.6	39.8	47.6	50.4	39.1	46.3	47.6
Cr	34.8	25.71	133	48.1	53.5	49	51	42.9	47.6	42.2
Co	7.58	6.68	6.91	7.64	7.66	7.97	8.4	7.55	8.61	8.75
Ni	22.2	19.53	13.4	34	35.4	36.7	34.4	34.8	33	32.6
Cu	35.9	6.92	29.9	24.7	15.3	38.7	19.6	14.5	22.3	9.34
Zn	53.7	46.96	59.5	54.8	43.8	55.2	46.6	50.6	57.7	58
Ga	17.2	16.89	18.3	19.2	17.6	19.3	19.5	18.3	19.1	19.4
Rb	61.5	69.67	64.9	78.6	41.3	41.6	52.4	71.5	74.7	84.9
Sr	359	324.47	403	422	355	494	358	481	462	348
Y	6.69	7.66	7.75	7.45	6.02	8.64	6.91	8.85	10.1	10.3
Zr	180	143.17	194	382	166	233	155	374	385	388
Nb	3.22	4.93	3.46	3.3	3.67	4	3.84	4.36	4.94	5.16
Cs	1.84	1.6	1.96	1.58	1.65	1.44	1.95	1.44	1.62	1.69
Ba	208	274.32	247	261	286	271	328	470	417	298
La	16.8	17.67	19	19.4	19.4	20.3	21.1	22.2	22.8	22.9
Ce	33.4	38.46	36.3	36.8	35	38.6	39.7	41.1	43.6	43.9
Pr	3.97	4.08	4.31	4.24	4.11	4.48	4.46	5	5.36	5.25
Nd	14.6	14.08	15.9	16.2	15.3	16.3	16.8	18.4	19.6	20.1
Sm	2.62	2.58	2.88	2.79	2.61	2.89	2.93	3.16	3.52	3.58
Eu	0.76	0.67	0.85	0.91	0.85	0.87	0.95	0.89	0.98	1.02
Gd	2.09	2.35	2.51	2.48	2.12	2.48	2.43	2.76	3	3.08
Tb	0.27	0.26	0.3	0.3	0.26	0.32	0.3	0.32	0.37	0.38
Dy	1.3	1.47	1.52	1.4	1.2	1.61	1.4	1.61	2	1.97
Ho	0.24	0.28	0.27	0.26	0.22	0.31	0.25	0.31	0.38	0.36
Er	0.66	0.79	0.82	0.72	0.65	0.95	0.74	0.93	1.04	1.07
Tm	0.09	0.13	0.1	0.1	0.08	0.13	0.09	0.12	0.14	0.15
Yb	0.52	0.77	0.7	0.6	0.5	0.8	0.55	0.8	0.94	0.97
Lu	0.08	0.11	0.1	0.1	0.07	0.12	0.08	0.12	0.13	0.14
Hf	4.43	3.88	4.86	7.83	4.4	5.55	4.41	7.78	7.94	8.59
Ta	0.23	0.58	0.26	0.21	0.26	0.27	0.28	0.31	0.35	0.35
Pb	9.22	8.98	7.76	8.23	8.37	10.1	9.6	9.57	8.65	9.54
Th	3.8	6.09	4.05	3.75	4.62	5.38	5.56	5.59	5.64	5.85
U	1.04	1.22	1.16	1.02	1.02	1.24	0.98	1.29	1.23	1.36
Sr/Y	53.6622	42.359	52	56.6443	58.9701	57.1759	51.809	54.3503	45.7426	33.7864
Eu/Eu*	0.961632	0.817395	0.945581	1.0368	1.07229	0.970391	1.0591	0.901576	0.899858	0.917498
(La/Yb)N	21.7816	15.4714	18.2995	21.7989	26.1587	17.1077	25.8645	18.7089	16.3528	15.9165
Rb/Sr	0.171309	0.214719	0.161042	0.186256	0.116338	0.0842105	0.146369	0.148649	0.161688	0.243966
(La/Yb)N_thickness (km)	52.7219	46.9067	49.7606	52.7354	55.8348	48.6157	55.6426	50.1367	47.8485	47.3888
Age(Ma)	373.7	373.7	374	385.5	385.5	385.6	387	387	387	391
Data sources	Q. G. Mao et al., 2012a	Q. G. Mao et al., 2012a	D. F. Song et al., 2013a	K, Q. Zhao et al., 2020	K, Q. Zhao et al., 2020	K, Q. Zhao et al., 2020	T. Yan et al., 2020	T. Yan et al., 2020	T. Yan et al., 2020	J. Y. Yu et al., 2016
Rock type	granite	granite	biotite-plagioclase gneiss	granodiorite	granodiorite	pyroxene diorite	tonalite	tonalite	tonalite	quartz diorite
Latitude(°N)	Liuyuan	Liuyuan	Niujuanzi	Gongpoquan	Gongpoquan	Gongpoquan	Dahongshan	Dahongshan	Dahongshan	Niujuanzi
Longitude(°E)
Sample	08LY03-02	08LY03-01	10MZS04	P32YQ4	P32YQ9	P32YQ2	5034Gs-1	5418Gs-1	6045Gs-1	141005
SiO2	65.51	65.24	70.38	62.82	64.36	55.24	65.34	69.64	69.8	66.04
TiO2	0.48	0.5	0.34	0.89	0.9	1.1	0.42	0.36	0.24	0.59
Al2O3	15.38	15.37	15.31	16.27	15.59	15.44	16.61	15.09	15.95	16.16
Fe2O3T	2.92	3.14	2.84	6.223	6.244	9.201	3.961	2.462	2.536	3.817
FeOT	2.62742	2.82537	2.55543	5.64677	5.66475	8.3507	3.58567	2.22675	2.29375	3.47
Fe2O3				1.13	1.25	1.49	1.64	1.23	1.26
FeO	1.7	1.8		4.63	4.54	7.01	2.11	1.12	1.16
MnO	0.04	0.05	0.04	0.09	0.09	0.15	0.1	0.05	0.16	0.07
MgO	2.01	2.01	0.82	1.98	1.86	4.79	1.57	1.01	0.9	1.9
CaO	3.34	3.47	3.03	4.78	4.29	8.48	4.21	3.28	3.74	3.8
Na2O	5.71	5.73	3.63	4.39	4.3	3.7	3.61	4.39	3.38	4.15
K2O	1.86	1.81	2.64	1.27	1.79	0.83	2.08	1.96	1.88	1.83
P2O5	0.19	0.19	0.14	0.22	0.21	0.08	0.27	0.13	0.16	0.14
LOI	2.19	2.11	0.94	0.88	0.63	0.99				1.68
Total	101.33	101.42	100.11	99.4	99.8	99.3	99.33	99.34	99.78	99.83
A/CNK	1.40972	1.396	1.64624	1.55843	1.50193	1.18678	1.67778	1.56698	1.77222	1.65235
Mg#	57.6927	55.9105	36.3863	38.4628	36.92	50.5555	43.8357	44.706	41.1562	49.3934
Li
Be
Sc			4.28				9.46	4.84	3.82	12
V	43.5	44	23.3	67	83	69	66.23	37.27	11.83	67
Cr	54.9	49.1	9.35	22.2	21.6	35.4	11.19	10.79	7.21	22
Co	8.42	8.66	5.2				9.2	5.11	2.71	12
Ni	34.4	35.6	6.48	8.9	4.7	21.8	9.94	5.89	1.58	13
Cu	5.72	12	3.41							7
Zn	60.4	58.1	36.7							53
Ga	19.1	18.8	19.1				17.66	19.43	16.46	18
Rb	69.6	68.2	65.2	44.1	70.9	31.6	79.31	62.38	65.66	91
Sr	406	404	226	264	222	260	321.3	241	347.4	332
Y	10.2	10.1	11.4	32.1	34.5	36.8	13.53	11.85	15.44	14.6
Zr	395	375	197	332	285	91	60.43	160.2	95.45	143
Nb	4.76	5.73	9.59	10.3	11.2	7.5	8.86	3.85	7.41	10.1
Cs	1.59	1.49	2.31	3.28	5.31	1.88	7.12	4.71	3.05	3.1
Ba	294	312	678	309	397	241	451	200.2	395.3	280
La	23	23.2	18.1	25.5	29.5	15.8	11.31	16.33	20.48	13.2
Ce	43.6	44.7	31.2	52.7	58.3	34.9	20.71	31.16	38.1	27.5
Pr	5.29	5.43	3.8	6.89	7.24	4.86	2.69	4.08	4.87	3.41
Nd	20	19.9	13.4	30.8	30.5	22.2	10.5	15.85	18.06	12.5
Sm	3.74	3.47	2.39	6.75	6.37	5.84	2.5	3.2	3.66	2.81
Eu	1	1	0.97	1.73	1.66	1.66	1.12	0.86	1.02	0.91
Gd	3	3.1	2.14	6.4	5.76	6.07	2.54	2.79	3.13	2.6
Tb	0.35	0.39	0.33	1.09	1.1	1.18	0.44	0.42	0.48	0.43
Dy	1.82	2.07	2	6.06	6.12	6.98	2.79	2.37	2.77	2.55
Ho	0.35	0.39	0.41	1.24	1.41	1.41	0.54	0.44	0.55	0.5
Er	1.06	1.1	1.14	3.46	3.98	4.2	1.4	1.14	1.53	1.36
Tm	0.14	0.16	0.18	0.51	0.63	0.65	0.21	0.17	0.25	0.21
Yb	0.94	0.99	1.17	3.13	3.93	4.09	1.32	1.07	1.72	1.38
Lu	0.13	0.15	0.19	0.54	0.67	0.69	0.19	0.16	0.27	0.21
Hf	8.3	8.23	5.61	8.28	7.73	2.85	1.7	4.2	2.4	3.96
Ta	0.4	0.41	0.91	0.72	0.91	0.51	0.96	0.67	0.93	0.9
Pb	10.1	9.87	16.3							14.6
Th	5.95	5.66	8.22	5.77	10.8	5.93	2.66	6.28	6.34	5.86
U	1.39	1.34	1.08	1.42	2.39	1.01	0.64	2.43	1.02	1.1
Sr/Y	39.8039	40	19.8246	8.2243	6.43478	7.06522	23.7472	20.3376	22.5	22.7397
Eu/Eu*	0.884547	0.914222	1.28635	0.793497	0.822679	0.846119	1.34687	0.860899	0.899557	1.0128
(La/Yb)N	16.4962	15.7993	10.4298	5.49263	5.06074	2.60446	5.77661	10.2893	8.02761	6.44881
Rb/Sr	0.171429	0.168812	0.288496	0.167045	0.319369	0.121538	0.246841	0.258838	0.189004	0.274096
(La/Yb)N_thickness (km)	47.997	47.2631	40.2031	29.3017	27.9095	16.6166	30.1586	39.9726	35.7528	32.03
Age(Ma)	391	391	391	391	394	394	394	398	398	398
Data sources	J. Y. Yu et al., 2016	J. Y. Yu et al., 2016	J. Y. Yu et al., 2016	J. Y. Yu et al., 2016	J. T. Wang et al., 2016	J. T. Wang et al., 2016	J. T. Wang et al., 2016	J. Y. Yu et al., 2016	J. Y. Yu et al., 2016	J. Y. Yu et al., 2016
Rock type	quartz diorite	quartz diorite	quartz diorite	quartz diorite	granodiorite	granodiorite	granodiorite	quartz diorite	quartz diorite	quartz diorite
Latitude(°N)	Niujuanzi	Niujuanzi	Niujuanzi	Niujuanzi	Heijianshan	Heijianshan	Heijianshan	Niujuanzi	Niujuanzi	Niujuanzi
Longitude(°E)
Sample	141008	141006	132104	132070	PM019GS11	PM018GS4	PM019GS9	131012	131039	131011
SiO2	64.37	64	62.86	59.7	67.27	67.42	66.57	60.16	58.31	66.14
TiO2	0.71	0.74	0.93	1.01	0.54	0.51	0.57	0.67	0.74	0.41
Al2O3	16.42	16.46	16.68	16.44	15.36	15.3	15.25	17.05	18.29	15.23
Fe2O3T	4.466	4.653	5.368	6.501	4.713	4.299	4.506	6.006	5.885	4.796
FeOT	4.06	4.23	4.88	5.91	4.28092	3.90084	4.08884	5.46	5.35	4.36
Fe2O3					0.39	0.79	0.81
FeO					3.93	3.19	3.36
MnO	0.08	0.09	0.08	0.12	0.1	0.09	0.09	0.09	0.1	0.09
MgO	2.19	2.28	2.3	4	1.41	1.38	1.75	3.61	3.38	2.6
CaO	4.3	4.15	4.34	5.79	3.29	3.68	4.09	6.47	5.96	5.29
Na2O	4.35	3.92	4.05	3.75	4.09	3.78	3.76	3.6	4.02	3.3
K2O	1.44	1.76	1.6	1.38	1	1.18	1.05	0.92	1.48	1.05
P2O5	0.15	0.16	0.16	0.26	0.09	0.1	0.1	0.19	0.21	0.11
LOI	1.7	2	1.9	1.31	2.04	2.24	2.24	1.15	1.55	0.93
Total	99.77	99.79	99.78	99.67	99.51	99.66	99.64	99.38	99.39	99.5
A/CNK	1.62735	1.67447	1.66967	1.50549	1.83294	1.77083	1.71348	1.55141	1.59599	1.57988
Mg#	49.019	49.0004	45.656	54.6784	36.9924	38.6731	43.2758	54.0982	52.9669	51.5264
Li
Be
Sc	13	12	14	16	7.6	7.2	5.5	15	14	18
V	81	87	104	160	39.1	37.4	48.3	147	122	108
Cr	21	24	46	74	14	11	16	55	44	39
Co	13	15	17	22	7.42	7.67	8.06	21	19	15
Ni	15	16	25	59	7.82	7.81	9.6	46	34	20
Cu	8	22	8	44				62	69	44
Zn	59	59	64	83				74	73	51
Ga	18	18	19	18				19	19	16
Rb	37	53	42	35	46	57	51	24	33	33
Sr	398	418	399	605	278	305	312	592	629	506
Y	15.5	18	17.8	22.3	18.2	16.5	17.3	13	17.5	17.8
Zr	129	141	145	147	142	151	145	129	120	128
Nb	6.13	7.52	10	7.2	11.3	9.53	8.91	3.42	6.31	3.36
Cs	3	2.7	2.7	0.6				1.3	1.7	1.4
Ba	245	301	351	540	332	384	352	272	326	244
La	13.4	14.5	15.8	21.9	15.2	18.4	19.2	12.9	13.3	13.6
Ce	27.8	32	34.3	48.3	32.1	40.8	44.2	29.5	33.5	37.4
Pr	3.57	3.9	4.46	6.03	3.58	4.11	4.41	3.85	4.87	3.86
Nd	13.9	14.6	16.8	23.8	15	17.2	18.8	15.6	21	16.2
Sm	3.35	3.43	3.99	5.27	3.13	3.36	3.36	3.76	4.75	3.86
Eu	0.99	1.04	1.18	1.42	0.77	0.95	0.81	1.1	1.26	0.88
Gd	3.15	3.33	3.66	4.95	3.1	3.38	3.58	3.28	4.2	3.68
Tb	0.49	0.52	0.56	0.74	0.48	0.46	0.47	0.48	0.61	0.56
Dy	2.86	3.12	3.38	4.25	3.04	2.84	3.18	2.72	3.64	3.36
Ho	0.58	0.65	0.67	0.87	0.63	0.56	0.62	0.52	0.68	0.68
Er	1.66	1.85	1.93	2.42	1.84	1.58	1.74	1.32	1.76	1.84
Tm	0.24	0.28	0.3	0.36	0.27	0.22	0.25	0.2	0.26	0.26
Yb	1.61	1.8	1.91	2.24	1.93	1.48	1.59	1.29	1.72	1.88
Lu	0.25	0.28	0.28	0.33	0.28	0.2	0.24	0.19	0.26	0.27
Hf	3.48	3.56	3.98	3.86	0.83	0.68	0.7	3.44	3.45	4.4
Ta	0.48	0.62	0.76	0.49	1.71	1.47	1.44	0.29	0.56	0.29
Pb	9.68	14.6	8.9	6.57				10.1	10.8	9.82
Th	3.75	5.58	4.22	2.01	12.7	10.1	10.6	4.32	4.64	4.93
U	0.56	0.83	0.86	0.52	1.48	0.82	1.41	1.06	1.7	0.99
Sr/Y	25.6774	23.2222	22.4157	27.13	15.2747	18.4848	18.0347	45.5385	35.9429	28.427
Eu/Eu*	0.918107	0.929465	0.928194	0.837483	0.747755	0.853683	0.709777	0.936951	0.844992	0.704212
(La/Yb)N	5.6113	5.431	5.5771	6.59145	5.30971	8.38187	8.14121	6.74194	5.21324	4.87714
Rb/Sr	0.0929648	0.126794	0.105263	0.0578512	0.165468	0.186885	0.163462	0.0405405	0.0524642	0.0652174
(La/Yb)N_thickness (km)	29.665	29.1098	29.5611	32.4019	28.7259	36.4869	35.9917	32.7856	28.4142	27.2813
Age(Ma)	398	398	398	399	402	402	407	407	407.7	407.7
Data sources	J. Y. Yu et al., 2016	J. Y. Yu et al., 2016	J. Y. Yu et al., 2016	T. Yan et al., 2020	J. T. Wang et al., 2016	J. T. Wang et al., 2016	Y. X. Wang et al., 2014	Y. X. Wang et al., 2014	Z. X. Yang et al., 2021	Z. X. Yang et al., 2021
Rock type	quartz diorite	quartz diorite	quartz diorite	granodiorite	diorite	diorite	granodiorite	granodiorite	granodiorite	granodiorite
Latitude(°N)	Niujuanzi	Niujuanzi	Niujuanzi	Dahongshan	Heijianshan	Heijianshan	Shibanjing	Shibanjing	Zhangfangshan	Zhangfangshan
Longitude(°E)
Sample	131041	131007	131008	6021Gs-1	PM019GS12	PM018GS9	2	1	9YQ-44	9YQ-21
SiO2	60.54	62.58	57.64	67.42	59. 24	61.43	68.46	66.49	64.23	67.81
TiO2	0.67	0.71	0.7	0.52	0.82	1.08	0.42	0.48	0.74	0.58
Al2O3	17.1	16.53	16.74	13.37	17.49	15.6	15.91	15.32	16.8	15.59
Fe2O3T	5.654	5.5	7.029	3.559	5.682	7.31	3.052	3.507	4.498	3.749
FeOT	5.14	5	6.39	3.22068	5.15886	6.63477	2.76275	3.17267	4.08082	3.40289
Fe2O3				1.59	0.71	1.15	1.27	1.67	0.89	0.57
FeO				1.79	4.52	5.6	1.62	1.67	3.28	2.89
MnO	0.1	0.08	0.11	0.08	0.1	0.12	0.06	0.07	0.05	0.06
MgO	3.33	1.81	4.14	1.57	3.69	2.26	1.62	1.92	1.83	1.19
CaO	5.69	5.55	7.73	4.21	6.36	4.86	4.53	4.77	5.03	4.26
Na2O	3.77	3.8	3.53	3.3	3.8	4.04	4.3	3.93	3.05	3.1
K2O	1.21	1.77	1.26	2.91	1.2	0.99	1.67	2.26	1.89	1.85
P2O5	0.21	0.19	0.17	0.16	0.1	0.24	0.15	0.14	0.16	0.17
LOI	1.63	1.38	0.87		1.46	2.2	0.82	1.95	1.53	1.77
Total	99.38	99.41	99.27	99.8	99.49	99.57	100.67	100.67	99.83	99.84
A/CNK	1.60262	1.48651	1.33706	1.28311	1.53961	1.57735	1.51524	1.39781	1.68506	1.69273
Mg#	53.5927	39.22	53.5937	46.4937	56.044	37.7794	51.1058	51.8938	44.4246	38.3993
Li									10.8	21.9
Be									2.62	3.73
Sc	15	17	18	10.51	13.7	13.4			10.1	5.13
V	121	124	205	80.5	96.1	71.4			60.8	29.2
Cr	49	13	71	34.38	32.2	20.7			17.8	11.4
Co	20	10	22	9.95	16.5	13.9			8.06	6.17
Ni	41	6	20	16.73	35.2	12.6			5.24	2.74
Cu	50	10	128						12.6	4.8
Zn	69	42	53						89.4	108
Ga	19	18	17	14.68					23.5	27.1
Rb	38	20	23	68.88	45.8	33.7	64.7	58.3	76.2	81
Sr	589	410	538	238.9	407	257	525	532	487	430
Y	13.9	24	16.7	17.28	16.9	29.1	11.2	13.7	8.55	16.69
Zr	88.9	146	101	115.9	120	276	116	114	363	262
Nb	5.38	5.22	3.36	6.24	3.86	13	11.1	8.63	15.2	25.8
Cs	1.7	1.3	1.1	1.61					1.87	2.17
Ba	315	349	379	613.1	284	515	752	533	647	711
La	16.8	17.3	17.5	19.69	10.4	24.1	13.8	17.1	50.94	53.27
Ce	38.2	38.5	42.1	37.68	25.3	52.9	28	34.9	93.35	106
Pr	5.03	5.1	5.56	4.95	2.96	5.7	3.58	4.36	10.85	12.1
Nd	19.6	21.2	22.1	19.19	13.3	26	15.7	19.5	38.51	44.3
Sm	4.31	5.37	5.04	4.03	2.87	5.2	3	3.78	6.14	8.1
Eu	1.12	1.31	1.34	0.95	0.98	1.64	1.02	1.09	1.47	2.1
Gd	3.57	5.01	4.51	3.55	3.03	5.4	2.64	3.2	4.72	6.38
Tb	0.52	0.79	0.66	0.55	0.45	0.79	0.39	0.47	0.55	0.82
Dy	2.96	4.58	3.64	3.27	2.96	5.12	2.11	2.43	2.24	3.4
Ho	0.54	0.94	0.71	0.64	0.58	1.02	0.42	0.47	0.34	0.51
Er	1.41	2.56	1.77	1.76	1.73	2.98	1.14	1.35	0.84	1.27
Tm	0.21	0.39	0.27	0.3	0.21	0.43	0.16	0.19	0.11	0.18
Yb	1.32	2.6	1.76	1.79	1.61	2.63	1.08	1.29	0.64	0.96
Lu	0.2	0.4	0.27	0.26	0.22	0.39	0.15	0.17	0.11	0.13
Hf	2.65	4.32	3.14	3.1	0.99	0.68	3.79	4.61	8.88	7.17
Ta	0.43	0.46	0.3	0.72	0.89	1.96	0.81	0.92	0.48	0.69
Pb	10.2	7.59	7.94						10.3	29.6
Th	4.76	6.09	4.88	25.34	6.5	6.24	6.26	6.07	15.2	19.7
U	1.56	1.59	1.32	2.82	2.12	1.78	2.28	1.5	0.85	2.29
Sr/Y	42.3741	17.0833	32.2156	13.8252	24.0828	8.83162	46.875	38.8321	56.9591	25.7639
Eu/Eu*	0.849242	0.760338	0.842885	0.752049	1.00946	0.939174	1.08513	0.934468	0.804649	0.863555
(La/Yb)N	8.58065	4.48598	6.70363	7.41613	4.35504	6.17797	8.6147	8.93698	53.6616	37.4107
Rb/Sr	0.0645161	0.0487805	0.0427509	0.288321	0.112531	0.131128	0.123238	0.109586	0.156468	0.188372
(La/Yb)N_thickness (km)	36.8854	25.86	32.6888	34.4059	25.3564	31.3006	36.9527	37.5771	68.0496	61.917
Age(Ma)	407.7	410	410	411.3	411.3	411.3	415	415	418	421.4
Data sources	Z. X. Yang et al., 2021	R. L. Bai et al., 2020	R. L. Bai et al., 2020	G. B. Liang et al., 2017	G. B. Liang et al., 2017	G. B. Liang et al., 2017	Y. Zhao et al., 2017	Y. Zhao et al., 2017	Y. Zhao et al., 2017	R. G. Zheng et al., 2018
Rock type	granodiorite	Bt-granodiorite	Bt-granodiorite	mylonitic quartz diorite	mylonitic quartz diorite	mylonitic quartz diorite	granodiorite	granodiorite	granite	quartz monzonite
Latitude(°N)	Zhangfangshan	Mazongshan	Mazongshan	Xiaoxigong	Xiaoxigong	Xiaoxigong	Dunhuang	Dunhuang	Dunhuang	Mazongshan
Longitude(°E)
Sample	9YQ-2	ZT001-4	ZT001-5	xx04	xx01	xx02	22DHSK	22DHSK	1301HX01	BA11-99
SiO2	60.85	64.61	67.55	57.97	58.26	58.18	67.7	67.3	71.13	64.72
TiO2	0.91	0.58	0.51	0.86	0.82	0.81	0.62	0.64	0.27	0.39
Al2O3	16.98	16.68	16.94	18	17.9	17.96	15.82	15.62	15.16	15.87
Fe2O3T	6.293	5.181	3.795	6.7	6.58	6.88	4.53	4.59	1.64	3.57
FeOT	5.71078	4.71	3.45	6.02866	5.92068	6.19062	4.07609	4.13008	1.47567	3.21229
Fe2O3	1.09
FeO	4.73
MnO	0.06	0.07	0.06	0.1	0.1	0.1	0.07	0.07	0.01	0.06
MgO	2.75	1.78	1.26	2.78	2.71	2.85	1.54	1.56	0.5	3.46
CaO	5.95	4.39	3.57	6.32	6	6.38	3.4	3.41	1.94	3.1
Na2O	2.79	3.64	4.21	3.75	3.91	3.74	2.97	2.93	4.25	3.56
K2O	1.75	1.95	1.69	1.18	0.86	0.91	2.6	2.59	3.71	3.52
P2O5	0.24	0.25	0.04	0.23	0.22	0.22	0.18	0.19	0.09	0.16
LOI	1.74	1.3	0.69	1.4	1.4	1.21	1.02	1.02	0.93	1.39
Total	99.83	99.94	99.96	99.29	98.76	99.24	100.45	99.92	99.63	99.81
A/CNK	1.61868	1.67134	1.78881	1.6	1.66202	1.62829	1.76366	1.74916	1.53131	1.55894
Mg#	46.1894	40.2505	39.4311	45.1147	44.9308	45.074	40.2437	40.2376	37.6548	65.7534
Li	18.4			4	2.8	4.7	29.7	34.7	5.55	50.1
Be	2.27			1.6	1.6	1.6	2.61	2.56	0.96	4.46
Sc	28.5	8.4	8.1	4.1	7.8	10.4	8.2	8.38	2.32	15
V	72.1	86	53	163.3	159.3	166.3	56.9	58.5	20.7	73
Cr	9.93	38	21	11.8	13.1	15.1	26.4	23.9	5.78
Co	10.8	10.9	6.5	11.7	11.6	12.7	71.3	59.9	49.8	9.85
Ni	4.46	11.4	6.1	10.9	11.6	12.6	12.5	10.5	4.65
Cu	5.32	51.4	4.2	5.8	7.9	7.9	15	15.2	1.91
Zn	117	68	54	100.7	98.2	104	70.7	73.6	41.7
Ga	24.7	21.6	22.3	25.4	25.1	27.9	20.7	20.7	16.2	20.3
Rb	83.4	118	112	31.5	67.1	73.7	106	104	86.2	152
Sr	418	587	389	830.9	856.8	882.6	453	449	266	472
Y	13.25	14.2	26.6	14.7	16.5	18.3	10.6	11.1	4.47	13.7
Zr	242	307	191	201	161.3	133.2	194	191	184	233
Nb	16.1	9.5	12.7	13.4	12.3	11.9	11.7	12.2	2.5	12.2
Cs	2.42			1.1	1.9	2.6	4.22	4.33	1.29	7.64
Ba	597	574	227	439	381.1	411.7	1021	1026	698	1036
La	59.99	37.6	55.9	16.64	29.35	34.2	34.7	37.8	24	40.3
Ce	118	68.6	103.5	40.32	65.83	71.45	63.2	68.7	44.3	75.9
Pr	13.4	7	11.45	4.38	6.68	7.62	6.8	7.5	4.69	7.83
Nd	48.8	24.1	40.7	19.43	26.31	29.37	24.8	27.1	16.9	28.2
Sm	8.62	3.99	7.81	4.03	4.58	5.31	4.01	4.39	2.9	4.12
Eu	1.64	1.06	1.23	0.94	1.03	1.17	1.22	1.27	0.82	1.03
Gd	6.75	3.11	6.42	4.03	4.01	4.29	3.22	3.5	2.21	4.07
Tb	0.84	0.44	0.86	0.37	0.38	0.42	0.39	0.42	0.23	0.531
Dy	3.2	2.47	4.77	2.63	2.59	2.76	2.07	2.17	1.01	2.76
Ho	0.45	0.51	0.95	0.51	0.48	0.53	0.37	0.39	0.15	0.522
Er	1.05	1.53	2.55	1.4	1.32	1.53	1.02	1.06	0.38	1.37
Tm	0.12	0.23	0.35	0.2	0.21	0.24	0.14	0.14	0.048	0.201
Yb	0.64	1.47	2.14	1.01	1.03	1.26	0.87	0.9	0.27	1.22
Lu	0.09	0.23	0.32	0.18	0.19	0.22	0.13	0.13	0.04	0.193
Hf	6.54	6.8	4.8	4.9	4	3.3	4.71	4.57	4.52	6.47
Ta	0.66			0.7	0.5	0.5	0.73	0.75	0.38	1.25
Pb	6.23			12.9	13.1	13	17.3	17.1	20.3	22.4
Th	18.5	10.75	29.3	2.5	7.5	7.9	9.19	10.4	12.9	29.8
U	0.78	2.35	3.47	0.9	1	0.9	1.45	1.44	1.72	1.98
Sr/Y	31.5472	41.338	14.6241	56.5238	51.9273	48.2295	42.7358	40.4505	59.5078	34.4526
Eu/Eu*	0.635091	0.888334	0.516193	0.706064	0.719203	0.726958	1.00608	0.959238	0.953356	0.760731
(La/Yb)N	63.1951	17.2447	17.6109	11.1075	19.2112	18.2995	26.8902	28.3161	59.9283	22.2705
Rb/Sr	0.199522	0.201022	0.287918	0.0379107	0.0783147	0.0835033	0.233996	0.231626	0.32406	0.322034
(La/Yb)N_thickness (km)	70.8296	48.7513	49.1086	41.2733	50.5872	49.7606	56.3037	57.1821	69.9273	53.0992
Age(Ma)	421.4	422	424.3	424.3	425	426	426	426	428	428.5
Data sources	R. G. Zheng et al., 2018	Y. X. Wang et al., 2014	Q. G. Mao et al., 2012a	Q. G. Mao et al., 2012a	Y. Zhao et al., 2017	X. F. Li et al., 2015	W. Zhang, 2013	X. F. Li et al., 2015	Y. Zhao et al., 2017	R. G. Zheng et al., 2021
Rock type	quartz monzonite	granitic aplite	granite	granite	diorite	pyroxene diorite	diorite	pyroxene diorite	diorite	augen gneiss
Latitude(°N)	Mazongshan	Shibanjing	Huitongshan	Huitongshan	Dunhuang	Mingshujing	Tongchangkou	Mingshujing	Dunhuang	Xiaoxigong
Longitude(°E)
Sample	BA11-97	5	LYB03-2	LYB19-2	38SX	XJ11-150	BS07-111	XJ11-144	14GZ01	17DJQ8-10-1
SiO2	61.04	70.8	66.96	63.86	56.74	56.01	55.62	56.54	59.69	56.3887
TiO2	0.78	0.18	0.42	0.67	0.76	0.96	0.86	1.03	0.82	0.7147
Al2O3	16.51	14.15	16.35	16.03	16.94	15.72	18.93	17.43	16.26	18.203
Fe2O3T	4.46	1.245	2.32	4.22	8.26	9.064	8.68	8.437	6.9	6.6387
FeOT	4.01311	1.12689	2.08754	3.79716	7.43235	8.24	7.81026	7.67	6.20862	5.9735
Fe2O3		0.53
FeO		0.65		1.11
MnO	0.06	0.074	0.03	0.06	0.14	0.12	0.12	0.12	0.12	0.1334
MgO	4.34	0.75	1.19	2.06	4.04	4.74	3.12	3.22	3.15	3.2086
CaO	3.77	3.35	2.25	3.17	5.09	7.32	6.73	6.27	3.5	7.1388
Na2O	3.47	1.81	5.3	4.33	3.93	3.43	4.19	3.53	3.29	3.7595
K2O	3.83	4.12	2.05	2.54	1.32	1.36	1.12	2.19	2.43	1.6619
P2O5	0.24	0.028	0.15	0.19	0.35	0.52	0.49	0.33	0.34	0.2
LOI	1.27	3.55	2.71	2.7	2.4	1.55	3.46	1.81	3.52	1.78607
Total	99.77	99.99	99.73	99.83	99.97	99.94	103.31	100.07	100
A/CNK	1.49142	1.52478	1.70313	1.59661	1.6383	1.2981	1.57226	1.45371	1.76356	1.44926
Mg#	65.8439	54.2619	50.4001	49.1623	49.211	50.6268	41.5914	42.8029	47.4896	48.9136
Li	80.8				22				20.7	13.5754
Be	2.9				2.42				2.09	1.65719
Sc	11.6				27.1				18.1	17.5209
V	92.6			71.46	193	164	246.4	162	140	144.496
Cr			20.21	29.73	36.1	64		10.8	20	5.89
Co	14.7		5.6	10.98	48	57.7		52.2	23.3	18.8193
Ni			11.11	18.83	13.8	35.1		14.9	10	19.3272
Cu			20.58	6.15	11	6.3		28.9	2.45
Zn			41.65	47.04	96.5	88.5		84.6	80.2
Ga	22.1		18.68	19.42	19.7	21.8	20	20.6	20	23.1677
Rb	179	56.8	48.85	38.37	37.3	36.5	33	71.3	109	66.2214
Sr	512	294	339.01	494.39	1276	652	585	641	674	677.931
Y	15.2	7.7	6.66	8.68	30.4	17.4	19.6	20.7	23.2	19.563
Zr	309	88.6	131.27	133.83	196	263	56	132	229	152.13
Nb	23.2	1.39	4.23	9.75	12.9	6.8	5.5	11.7	15	15.9978
Cs	9.19		2.24	4.1	0.86	0.76		2.26	2.12	0.73
Ba	1416	290	210.47	623.7	614	357	329	786	930	785.855
La	40.5	14.8	17.89	22.63	43.7	15.6	28.9	31.9	55	30.0251
Ce	82	1.8	35.74	47.4	89.7	37.7	59	63.5	107	60.2343
Pr	9.24	6.51	4.39	5.32	10.2	5.46	6.9	7.72	12.3	6.60762
Nd	36.5	1.2	15.81	19.27	40.7	24.7	28.9	29.9	43.8	26.5841
Sm	5.64	0.38	2.97	3.5	8.2	5.53	5.86	5.8	7.67	5.3229
Eu	1.16	1.07	0.75	0.9	2.07	1.36	1.681	1.53	2	1.42667
Gd	5.1	0.15	2.14	2.66	6.93	4.69	5.01	4.99	6.26	4.29656
Tb	0.634	0.77	0.28	0.34	0.96	0.65		0.69	0.81	0.67065
Dy	3.11	0.15	1.34	1.67	5.56	3.5	4.07	3.9	4.32	4.1155
Ho	0.584	0.37	0.23	0.3	1.05	0.64		0.73	0.83	0.771665
Er	1.55	0.05	0.63	0.79	2.94	1.69	2.05	2.02	2.33	2.28948
Tm	0.231	0.34	0.1	0.13	0.42	0.23		0.28	0.34	0.315432
Yb	1.48	0.05	0.68	0.83	2.64	1.41	1.74	1.78	2.2	2.18705
Lu	0.232	4.02	0.1	0.13	0.38	0.22	0.242	0.27	0.32	0.323127
Hf	7.59	2.23	3.39	3.84	4.8	6.66	1.5	3.53	5.45	4.20635
Ta	1.75	0.15	0.33	0.78	0.66	0.32	0.5	0.77	0.73	0.919686
Pb	25.3		6.27	14.8	13.4	9.7	14.3	15.9	20.7	15.5287
Th	13.5	2.32	4.17	9.16	13	2.83	6.9	9.72	23.2	8.41572
U	2.77	0.82	1.09	2.66	1.34	1.32	2.12	1.87	2.11	1.77618
Sr/Y	33.6842	38.1818	50.9024	56.9574	41.9737	37.4713	29.8469	30.9662	29.0517	34.6537
Eu/Eu*	0.649288	11.5179	0.868679	0.867848	0.818604	0.796409	0.926037	0.849473	0.856992	0.88459
(La/Yb)N	18.4492	199.561	17.7372	18.3819	11.1599	7.45916	11.1978	12.0825	16.8548	9.25573
Rb/Sr	0.349609	0.193197	0.144096	0.0776108	0.029232	0.0559816	0.0564103	0.111232	0.161721	0.0976817
(La/Yb)N_thickness (km)	49.8991	90.3778	49.2301	49.837	41.3534	34.5043	41.411	42.7036	48.3626	38.1729
Age(Ma)	429.9	430	430	430	430	430	430	430	430	430
Data sources	R. G. Zheng et al., 2021	R. G. Zheng et al., 2021	R. G. Zheng et al., 2021	R. G. Zheng et al., 2021	R. G. Zheng et al., 2021	R. G. Zheng et al., 2021	R. G. Zheng et al., 2021	R. G. Zheng et al., 2021	R. G. Zheng et al., 2021	Y. X. Wang et al., 2014
Rock type	diorite	augen gneiss	augen gneiss	augen gneiss	augen gneiss	augen gneiss	augen gneiss	augen gneiss	augen gneiss	granitic mylonite
Latitude(°N)	Xiaoxigong	Xiaoxigong	Xiaoxigong	Xiaoxigong	Xiaoxigong	Xiaoxigong	Xiaoxigong	Xiaoxigong	Xiaoxigong	Shibanjing
Longitude(°E)
Sample	15BS51-1	17DJQ8-8	17DJQ8-7	17DJQ8-5	17DJQ8-2	17DJQ8-6	17DJQ8-9	17DJQ8-3	17DJQ8-4	4
SiO2	60.27	55.4503	60.6438	58.5807	57.4101	55.77	56.9518	61.4597	56.7536	71.57
TiO2	0.606	0.7664	0.5535	0.6262	0.7018	0.7641	0.7128	0.5196	0.7299	0.25
Al2O3	16.47	18.3205	17.8108	17.682	17.8597	18.3846	18.3047	17.6494	18.4301	15.1
Fe2O3T	6	7.5771	5.3927	6.1743	6.7119	7.3501	6.2838	5.0592	6.1769	1.848
FeOT	5.3988	6.81787	4.85235	5.55564	6.03937	6.61362	5.65416	4.55227	5.55797	1.6799
Fe2O3										0.011
FeO	3.72									1.67
MnO	0.098	0.1411	0.1005	0.1248	0.1305	0.1313	0.1296	0.0977	0.1245	0.092
MgO	2.38	3.7211	2.3484	2.9598	3.2332	3.6765	3.0822	2.2192	3.0497	0.69
CaO	6.07	7.4823	6.3838	6.265	7.0273	7.1223	7.1335	6.3866	6.6209	2.84
Na2O	3.82	3.4357	3.9189	3.7733	3.6864	3.4463	3.8135	3.8896	3.9374	1.2
K2O	1.37	1.6365	1.3704	1.3603	1.3618	1.4766	1.7996	1.0942	1.4571	5.22
P2O5	0.174	0.2137	0.1746	0.1828	0.1899	0.2106	0.1919	0.1694	0.1967	0.032
LOI	2.71	1.17717	1.43927	2.4349	1.79426	1.71315	1.65062	1.5653	2.54473	1.34
Total										100.02
A/CNK	1.4627	1.45928	1.5258	1.55124	1.479	1.5263	1.43605	1.55222	1.53387	1.63067
Mg#	44.003	49.3127	46.3144	48.7089	48.8305	49.7717	49.2822	46.4947	49.4462	42.2685
Li	18.1	21.0235	9.60899	16.1516	19.6344	23.5716	12.4336	11.9254	15.5561
Be	1.42	1.50571	1.58521	1.64804	1.59181	1.57324	1.64611	1.58108	1.71917
Sc	13.8	17.762	10.2128	14.673	15.6757	18.2157	15.6124	9.12805	15.5332
V	136	170.336	118.162	121.439	134.668	163.605	135.64	100.458	139.411
Cr	23.1	5.77	5.6	5.38	12.3	5.5	5.43	3.49	4.05
Co	14.9	19.7324	13.5294	14.2208	17.1675	18.7715	14.3052	11.2382	13.2559
Ni	11.5	35.0665	16.8996	14.4332	15.6148	18.3442	15.3962	11.8228	13.3061
Cu
Zn
Ga	22.5	22.5065	19.6063	20.7567	21.6622	22.6821	21.871	19.0768	22.4294
Rb	49.7	67.6191	54.0804	55.1213	55.0073	58.7197	71.7143	42.9301	61.9991	34.3
Sr	623	646.463	756.404	594.82	713.503	663.986	673.492	767.084	597.081	571
Y	20.2	19.8526	12.9625	16.4171	19.8492	18.9191	17.5905	14.7803	18.4861	21
Zr	181	111.136	100.524	140.564	120.436	117.16	125.751	125.831	136.603	148
Nb	15.1	14.4264	11.8792	12.5928	16.2802	14.1696	15.8375	11.0577	15.7613	2.27
Cs	2.49	1.66	1.96	8.44	9.15	8.84	1.17	8.89	8.48
Ba	417	510.254	527.848	499.504	406.398	486.184	775.099	437.291	501.8	362
La	31.5	20.2159	20.7044	22.5671	22.7268	25.6483	29.7249	35.4006	42.1083	42.5
Ce	62.4	44.34	42.4377	46.9169	47.9605	54.1025	58.7975	70.9408	82.816	4.9
Pr	7.32	5.32193	4.75431	5.5012	5.61834	6.21313	6.53933	7.55977	8.72794	16.8
Nd	28	22.683	18.9297	22.1828	23.2615	25.2553	25.6585	28.3688	32.8454	2.9
Sm	5	4.85374	3.6183	4.40087	4.91078	4.9578	4.86414	4.87144	5.71647	0.79
Eu	1.25	1.35647	1.04158	1.07172	1.34072	1.28535	1.31264	1.24432	1.50019	1.8
Gd	4.11	4.14322	2.84912	3.53983	4.06086	3.98639	3.89407	3.50917	4.23703	0.21
Tb	0.705	0.658098	0.441082	0.559904	0.651556	0.63863	0.612331	0.52899	0.653651	0.9
Dy	3.59	4.11735	2.70344	3.41756	4.0806	3.93524	3.68504	3.06691	3.92752	0.16
Ho	0.724	0.791647	0.513722	0.661102	0.776141	0.746847	0.715227	0.587809	0.738546	0.46
Er	2.03	2.33128	1.55022	1.9567	2.33114	2.2157	2.11541	1.73548	2.17654	0.06
Tm	0.321	0.313214	0.215406	0.265427	0.315869	0.305352	0.293442	0.237414	0.304981	0.41
Yb	2.18	2.16047	1.40255	1.80314	2.11578	2.07482	1.95514	1.65225	2.01973	0.06
Lu	0.308	0.320848	0.211923	0.262372	0.316176	0.308887	0.288023	0.238756	0.300312	4.4
Hf	5.33	2.97592	2.69592	3.73012	3.26681	3.16289	3.41312	3.32219	3.61419	3.7
Ta	0.814	0.706089	0.591138	0.656666	1.24291	0.718636	0.919713	0.603374	1.00183	0.16
Pb	14.5	16.3218	17.628	17.8698	16.1276	17.6045	15.6046	17.5785	16.3719
Th	7.61	2.73313	5.3329	5.50075	6.30537	4.41916	9.18923	9.66574	13.3021	3.58
U	1.15	1.34563	1.35299	1.38426	1.77922	1.53806	1.84258	1.65587	2.16741	1.37
Sr/Y	30.8416	32.5632	58.3531	36.2319	35.9463	35.0962	38.2873	51.8991	32.2988	27.1905
Eu/Eu*	0.819412	0.902727	0.958944	0.804792	0.892806	0.856904	0.893416	0.878757	0.89375	10.0738
(La/Yb)N	9.74179	6.30857	9.95242	8.43786	7.24191	8.33418	10.2501	14.4451	14.0559	477.554
Rb/Sr	0.0797753	0.104599	0.0714968	0.0926688	0.0770947	0.0884351	0.106481	0.0559653	0.103837	0.0600701
(La/Yb)N_thickness (km)	39.043	31.6562	39.4066	36.6001	34.0018	36.3899	39.9076	45.7398	45.2755	105.211
Age(Ma)	430.9	430.9	430.9	430.9	431.1	431.1	431.1	433.5	433.5	433.5
Data sources	H. Wang et al., 2021	H. Wang et al., 2021	H. Wang et al., 2021	H. Wang et al., 2021	R. G. Zheng et al., 2021	R. G. Zheng et al., 2021	R. G. Zheng et al., 2021	R. G. Zheng et al., 2021	R. G. Zheng et al., 2021	R. G. Zheng et al., 2021
Rock type	plagiogranite	quartz diorite	dioritic mylonite	plagiogranite	augen gneiss	augen gneiss	augen gneiss	diorite	diorite	diorite
Latitude(°N)	Shuanjingzi	Shuanjingzi	Shuanjingzi	Shuanjingzi	Xiaoxigong	Xiaoxigong	Xiaoxigong	Xiaoxigong	Xiaoxigong	Xiaoxigong
Longitude(°E)
Sample	PM10YQ3	PM10YQ4	PM10YQ1	PM10YQ5	17DJQ8-10-3	17DJQ8-10-5	17DJQ8-10-4	17DJQ11-3	17DJQ13-1	17DJQ13-2
SiO2	68.35	60.55	57.52	69.08	61.2776	61.3946	60.3969	58.46	58.92	60.68
TiO2	0.49	0.78	0.52	0.4	0.7444	0.673	0.758	0.737	0.703	0.678
Al2O3	15.35	16.9	14.66	15.53	17.5698	17.6986	17.5754	17.03	17.13	17.27
Fe2O3T	3.295	5.646	8.755	2.88	5.5351	5.3269	5.8716	6.69	6.18	5.89
FeOT	2.98273	5.11359	7.93038	2.60778	4.98048	4.79314	5.28327	6.01966	5.56076	5.29982
Fe2O3	1.37	2.06	3.09	1.12
FeO	1.75	3.26	5.15	1.6				3.87	3.59	3.54
MnO	0.06	0.1	0.14	0.06	0.0959	0.084	0.0932	0.124	0.113	0.107
MgO	1.45	2.96	4.37	1.31	2.4522	2.3771	2.648	3.28	3.07	2.59
CaO	3.51	5.48	5.57	3.77	6.2168	5.914	6.1174	6.47	5.94	5.71
Na2O	4.02	3.8	2.44	4.32	4.0175	3.8745	3.7581	3.35	3.52	3.57
K2O	1.99	1.9	3.05	1.57	1.5123	1.7148	1.7496	1.36	2.16	1.92
P2O5	0.11	0.16	0.11	0.11	0.1827	0.1803	0.1952	0.216	0.217	0.202
LOI	1.39	1.9	3.12	1	0.718993	0.935696	1.158	2.25	2.02	1.36
Total	99.86	99.85	99.76	99.88
A/CNK	1.61239	1.51163	1.3255	1.60766	1.49573	1.53857	1.51185	1.52326	1.47418	1.54196
Mg#	46.4252	50.783	49.5525	47.2419	46.742	46.9222	47.1854	49.2713	49.5995	46.556
Li					10.7059	13.9372	13.4639	15.6	14.4	12.1
Be					1.6725	1.82905	1.69446	1.6	1.76	1.88
Sc					11.6172	12.0215	14.2822	13.1	13.2	10.4
V	44.3	109	228	28.3	111.684	96.1734	109.653	146	136	129
Cr	12.4	7.27	44.2	7.94				34	19.8	17
Co	7.42	16	25.4	5.68	14.5162	11.8748	13.7963	17.1	15.2	12.4
Ni	5.44	1.96	11.3	3.89	14.3796	15.2957	26.1932	14.4	8.33	6.78
Cu
Zn
Ga					21.472	20.8579	21.6567	20.3	20.4	20.4
Rb	20.4	59.6	81.3	10.6	56.3207	58.391	62.0563	58	82.8	67.8
Sr	409	677	289	320	563.299	582.72	626.789	686	540	581
Y	11.97	12.2	14.24	9.38	15.1819	13.8357	15.5611	19.3	20.2	16.8
Zr	115	97.9	55.7	106	166.704	140.699	140.589	139	148	133
Nb	6.8	8.65	2.48	4.72	11.1168	10.7294	10.868	18.2	21.1	18.6
Cs	0.66	2.08	1.19	0.93	1.83		1.23	3	4.16	2.84
Ba	424	321	1020	204	426.347	597.1	503.606	529	589	610
La	6.4	9.89	10.1	23.69	12.7954	12.8075	24.9249	22.3	27.5	34.5
Ce	15.01	20.69	21.81	42.47	28.2941	27.7259	50.8609	42.5	49.7	58.9
Pr	2.4	2.98	2.83	4.9	3.77375	3.63363	6.02892	5.18	5.84	6.78
Nd	11.34	12.74	12.48	17.53	16.7588	16.2226	24.5602	21.3	24.7	25.3
Sm	2.94	2.74	2.88	2.95	3.94296	3.71467	4.80004	4.13	4.48	4.41
Eu	0.95	1.03	0.93	0.95	1.10279	1.04116	1.16404	1.2	1.16	1.06
Gd	2.64	2.72	2.83	2.84	3.35086	3.14311	3.73987	3.71	4.04	3.9
Tb	0.42	0.42	0.46	0.37	0.535633	0.489079	0.57122	0.69	0.695	0.648
Dy	2.32	2.39	2.72	1.78	3.03837	2.73323	3.13952	3.4	3.63	3.34
Ho	0.43	0.45	0.55	0.32	0.594606	0.53458	0.604273	0.697	0.741	0.62
Er	1.32	1.38	1.75	1.03	1.61548	1.46073	1.63196	1.99	2.13	1.93
Tm	0.21	0.22	0.29	0.16	0.227124	0.191163	0.213607	0.334	0.335	0.284
Yb	1.36	1.4	1.94	1.16	1.35592	1.20687	1.33665	2.06	2.05	1.77
Lu	0.16	0.19	0.24	0.14	0.215329	0.177768	0.199962	0.296	0.28	0.256
Hf	8.83	2.94	1.64	6.19	3.64262	3.08623	3.10234	3.41	3.59	3.24
Ta	0.72	0.62	0.27	0.44	0.873971	0.70816	0.578274	0.917	1.08	1.15
Pb	10	14.5	7.58	9.07	21.8482	21.8341	19.0705	11.1	16.6	13.8
Th	2.84	4.13	4.49	3.42	3.05322	2.32048	6.05155	4.17	5.56	9.01
U	0.7	1.87	1.12	0.61	2.43773	1.81528	1.80113	1.55	1.19	1.03
Sr/Y	34.1688	55.4918	20.2949	34.1151	37.1032	42.117	40.2793	35.544	26.7327	34.5833
Eu/Eu*	1.02297	1.14149	0.984832	0.990683	0.904998	0.908479	0.811016	0.919706	0.818313	0.765623
(La/Yb)N	3.17268	4.7627	3.50998	13.7687	6.36216	7.15465	12.5719	7.29831	9.04406	13.1411
Rb/Sr	0.0498778	0.0880355	0.281315	0.033125	0.0999838	0.100204	0.0990066	0.0845481	0.153333	0.116695
(La/Yb)N_thickness (km)	19.9715	26.8776	21.6891	44.9245	31.8	33.7957	43.3786	34.1337	37.7796	44.1313
Age(Ma)	435	435.4	435.4	435.4	435.4	436	437	437	437	437.2
Data sources	R. G. Zheng et al., 2021	R. G. Zheng et al., 2018	R. G. Zheng et al., 2018	R. G. Zheng et al., 2018	R. G. Zheng et al., 2018	X. F. Li et al., 2015	X. F. Li et al., 2015	X. F. Li et al., 2015	X. F. Li et al., 2015	R. G. Zheng et al., 2021
Rock type	diorite	quartz diorite	quartz diorite	quartz diorite	quartz diorite	granite	diorite	diorite	diorite	Granodiorite gneiss
Latitude(°N)	Xiaoxigong	Mazongshan	Mazongshan	Mazongshan	Mazongshan	Mingshujing	Mingshujing	Mingshujing	Mingshujing	Xiaoxigong
Longitude(°E)
Sample	15BS47-1	BA11-84	BA11-85	BA11-87	BA11-95	XJ11-137	XJ11-138	XJ11-142	XJ11-149	17DJQ14-1-2
SiO2	59.68	61.97	60.62	62.63	62.78	70.06	59.07	58.25	57.42	68.3901
TiO2	0.748	0.61	0.61	0.52	0.55	0.33	0.68	0.98	0.98	0.2915
Al2O3	16.9	16.34	17.37	16.73	16.43	14.8	18.4	17.5	17.01	16.2165
Fe2O3T	6.17	4.87	5.3	4.38	4.62	2.805	6.314	7.59	7.7	2.5231
FeOT	5.55177	4.38203	4.76894	3.94112	4.15708	2.55	5.74	6.9	7	2.27029
Fe2O3
FeO	3.38
MnO	0.116	0.08	0.09	0.07	0.08	0.03	0.08	0.11	0.09	0.091
MgO	2.87	3.8	4.09	3.63	3.86	0.99	2.46	2.63	3.77	0.8388
CaO	6.24	4.57	4.63	4.56	4.34	2.12	5.13	5.52	6.32	3.0476
Na2O	3.16	3.61	3.72	3.42	3.55	3.25	4.07	3.65	3.91	4.7545
K2O	2.05	2.25	2.11	2.46	2.16	4.78	2.94	2.87	1.53	2.2544
P2O5	0.206	0.35	0.36	0.23	0.24	0.1	0.23	0.34	0.28	0.094
LOI	1.8	1.34	0.97	1.2	1.19	1.04	1.12	1.31	1.57	1.54106
Total		99.77	99.86	99.83	99.82	100.09	99.95	100.11	99.85
A/CNK	1.47598	1.56663	1.66061	1.60249	1.63483	1.45813	1.51565	1.45349	1.44643	1.61254
Mg#	47.9569	60.7193	60.4549	62.1473	62.3373	40.8998	43.3088	40.456	48.9802	39.7079
Li	15.4	69	72.9	65.6	62.9					9.66161
Be	1.5	1.95	1.89	1.6	1.76					1.68781
Sc	17.2	9.08	11.5	10.2	9.73					4.18141
V	137	81.9	89.1	85.3	85.3	37.9	94.6	125	154	42.6834
Cr	25.6					10.6	29.1	9.9	52.1	65.8
Co	13.6	15.2	16.4	13.2	13.9	90.2	58.8	60.5	56.1	3.62645
Ni	11.6					5.91	13.9	10.4	32.8	6.68929
Cu						3.34	24.8	20.6	25.6
Zn						30.5	65.5	77.6	86.5
Ga	19.6	20.2	21.6	20.6	20	15.1	20.8	20.3	23.4	17.9835
Rb	62.9	96.9	104	82.2	79.2	98.4	86.4	102	48.6	100.427
Sr	676	523	515	573	560	457	780	614	735	787.652
Y	19.9	15.9	17.3	15.9	15.6	14.1	15.8	21.9	15.7	13.7914
Zr	128	222	226	210	237	141	240	157	212	133.615
Nb	17.7	17.1	16.5	14.7	14.1	9.66	9.57	12.9	11.4	20.1119
Cs	3.34	6.35	5.25	4.57	6.45	0.95	2.2	3.44	1.15	0.796
Ba	629	1122	645	855	882	1200	1418	802	517	1253.33
La	27.3	28.6	32.3	34.2	34.5	37.7	24	34.3	36.6	25.7367
Ce	49.3	62.6	66.2	68.2	68.9	65.2	49.4	67.8	72.6	48.7773
Pr	6.11	6.58	7.29	7.44	7.42	6.88	5.97	8.34	8.35	4.74291
Nd	23.2	25.7	27.8	27.6	28.9	22.9	22.7	32.2	31.9	16.9731
Sm	4.74	4.5	4.79	4.62	4.61	3.88	4.3	6.2	5.66	2.97555
Eu	1.03	1.39	1.29	1.33	1.36	0.88	1.2	1.6	1.43	0.92412
Gd	3.77	4.32	4.63	4.37	4.37	3.21	3.65	5.29	4.4	2.35022
Tb	0.709	0.591	0.622	0.583	0.583	0.44	0.5	0.73	0.57	0.391042
Dy	3.62	3.11	3.27	3.03	3.04	2.48	2.85	4.1	3.08	2.55062
Ho	0.62	0.602	0.631	0.582	0.591	0.48	0.56	0.78	0.55	0.510521
Er	1.9	1.62	1.73	1.62	1.63	1.37	1.59	2.18	1.44	1.63143
Tm	0.348	0.253	0.261	0.243	0.252	0.21	0.23	0.31	0.2	0.244452
Yb	2.04	1.55	1.64	1.53	1.6	1.38	1.51	1.97	1.24	1.73736
Lu	0.3	0.242	0.262	0.242	0.243	0.2	0.23	0.3	0.18	0.273674
Hf	4.42	5.51	5.6	5.24	5.87	4.09	6.12	4.33	5.18	3.5399
Ta	0.833	1.98	1.79	1.75	1.87	1.32	0.71	0.88	0.6	1.26821
Pb	15	26	16.4	15.1	15.9	21.8	13.7	15.2	11.4	19.9555
Th	5.15	6.62	6.55	6.72	7.22	23.1	6.54	11.7	8.56	10.8551
U	1.02	1.73	1.61	1.47	1.6	2.64	2	2.9	2. 1 1	2.20128
Sr/Y	33.9698	32.8931	29.7688	36.0377	35.8974	32.4113	49.3671	28.0365	46.8153	57.1118
Eu/Eu*	0.721167	0.951371	0.827087	0.892162	0.913441	0.74155	0.903417	0.833737	0.845645	1.0334
(La/Yb)N	9.0223	12.44	13.2783	15.0702	14.5373	18.4182	10.7157	11.7385	19.8996	9.9873
Rb/Sr	0.0930473	0.185277	0.201942	0.143455	0.141429	0.215317	0.110769	0.166124	0.0661224	0.127501
(La/Yb)N_thickness (km)	37.7386	43.1993	44.308	46.46	45.8479	49.8705	40.6627	42.2126	51.1856	39.4661
Age(Ma)	438	439	440.2	440.2	444	446	447.6	448.7	448.7	450
Data sources	Y. Yuan et al., 2018	R. G. Zheng et al., 2021	R. G. Zheng et al., 2021	R. G. Zheng et al., 2021	Y. Yuan et al., 2018	Y. Yuan et al., 2018	D. F. Song et al., 2013a	S. D. Wang et al., 2018a	S. D. Wang et al., 2018a	Y. Yuan et al., 2018
Rock type	mylonitic granite	augen gneiss	diorite	diorite	mylonitic granite	mylonitic granite	mylonitic granite	plagiogranite	plagiogranite	diorite
Latitude(°N)	Hongliuxia	Xiaoxigong	Xiaoxigong	Xiaoxigong	Hongliuxia	Hongliuxia	Mazongshan	Niujuanzi	Niujuanzi	Shibanjing
Longitude(°E)
Sample	X10-54-1	17DJQ8-10-2	15BS50-2	15BS50-1	X10-49-1	X10-48-1	10SYQ05	NJ-54	NJ-18	X10-73-1
SiO2	71.33	59.7052	57.91	58.11	65.26	70.57	68.63	70.39	66.45	61.09
TiO2	0.34	0.7727	0.854	0.829	0.49	0.33	0.39	0.55	0.59	0.87
Al2O3	14.03	17.5339	17.25	17.28	17.08	14.66	15.71	13.9	14.96	16.36
Fe2O3T	2.8611	5.9798	6.82	6.87	3.6883	2.2176	3.23	5.368	5.148	6.3404
FeOT	2.601	5.38062	6.13664	6.18163	3.353	2.016	2.90635	4.88	4.68	5.764
Fe2O3								1.23	0.97
FeO			4.01	3.76				3.77	3.82
MnO	0.06	0.0902	0.125	0.123	0.08	0.04	0.06	0.08	0.07	0.09
MgO	1.12	2.7229	3.07	3.06	1.66	0.78	1.18	2.7	3.43	2.72
CaO	1.44	6.0149	6.89	6.49	4.33	2.29	2.99	2.61	5.22	5.58
Na2O	4.2	3.7763	3.15	3.33	4.41	3.49	3.54	4	3.69	2.21
K2O	3.16	1.8595	1.13	1.17	1.79	4.05	2.59	0.64	0.62	3
P2O5	0.13	0.1954	0.245	0.242	0.17	0.1	0.17	0.14	0.19	0.19
LOI	1.64	1.5236	2.54	2.46	1.39	1.32	1.54	1.79	1.67	0.9
Total	100.051				100.013	99.646	100.03			98.92
A/CNK	1.59432	1.50497	1.54432	1.57234	1.62203	1.49135	1.72259	1.91724	1.56978	1.51622
Mg#	43.425	47.4255	47.1391	46.8758	46.879	40.8169	41.986	49.6536	56.643	45.6867
Li	25.3003	15.2666	19.9	26.5	15.9052	12.3138				23.3872
Be	2.1006	1.78759	1.97	2.21	2.8314	2.79515				2.38359
Sc		13.7274	15.3	16.7			5.01
V	38.4445	114.986	154	163	49.3656	27.5759	45.4			128.006
Cr	7.83117	123	17.2	17.4	30.6595	4.26444	10.25			27.4092
Co	3.79407	13.7047	16.6	17.1	8.66782	2.88998	5.79			14.9234
Ni	2.765	16.1628	6.76	6.56	15.2798	2.43675	8.75			10.6916
Cu							7.49
Zn							39.8
Ga	13.8891	21.4058	21.3	23.4	17.4797	16.972	18.8			20.9033
Rb	87.6451	67.6728	54.9	54	91.7196	128.523	91.5	16.5	19.2	107.876
Sr	285.221	581.165	719	756	351.618	506.056	400	285	139	382.392
Y	9.88975	15.3522	22.2	23.3	19.7476	21.7694	12.6	15.06	44.24	30.6859
Zr	123.802	133.005	189	231	180.197	196.742	142	157	304	239.188
Nb	11.215	12.0438	21.9	22.8	17.5683	18.1733	12.3	8.64	11.5	14.0586
Cs		2.08	3.07	2.77			2.53	1.24	1
Ba	1498.02	600.47	465	484	401.184	1645.5	1419	380	147	1101.5
La	18.6358	9.2827	41.1	41.5	30.0792	56.249	20.8	22.05	24.03	42.5448
Ce	32.165	20.9328	72.7	75.6	62.5051	100.575	20.8	44.04	55.17	89.1136
Pr	3.99297	2.96162	8.01	8.51	6.49852	10.7796	4.3	5.23	7.64	10.3403
Nd	14.051	14.5448	30.4	31.5	23.2114	36.2452	15	18.09	30.35	39.1033
Sm	2.57777	3.75963	5.43	5.81	4.31533	6.06219	2.84	3.44	7.61	7.93436
Eu	0.768852	1.00377	1.38	1.48	1.03233	1.23713	0.91	0.82	1.03	1.74674
Gd	2.10795	3.42753	4.64	4.9	4.02952	4.47259	2.48	2.75	7.62	6.74242
Tb	0.328061	0.525282	0.795	0.822	0.622415	0.690888	0.38	0.45	1.37	1.02314
Dy	1.7941	3.04446	4.13	4.32	3.50101	3.7078	2.26	2.66	8.28	5.87843
Ho	0.336193	0.582858	0.786	0.839	0.630359	0.707603	0.45	0.55	1.54	1.06703
Er	1.00076	1.57548	2.24	2.36	1.80099	2.04691	1.27	1.87	4.32	2.949
Tm	0.144396	0.205447	0.351	0.378	0.271356	0.324427	0.19	0.29	0.67	0.427398
Yb	0.947688	1.34006	2.3	2.49	1.63247	2.13025	1.27	2	4.13	2.68475
Lu	0.141343	0.200344	0.332	0.352	0.234749	0.323185	0.2	0.3	0.56	0.382613
Hf	3.45273	2.97579	5.37	6.4	4.50826	5.40864	4.21	7.01	11.7	6.5458
Ta	0.849672	0.650076	1.22	1.28	1.66112	3.12679	1.01	0.6	0.7	1.15569
Pb	11.4801	21.3939	11.7	12.4	21.5308	28.4908	11.4	16	8.96	7.86275
Th	8.87719	1.71308	10.4	11.2	13.7666	30.8912	10.9	8.26	3.35	14.115
U	3.0616	1.74465	0.922	2.11	3.42853	3.11046	1.5	1.28	1.37	3.26183
Sr/Y	28.84	37.8555	32.3874	32.4464	17.8056	23.2462	31.746	18.9243	3.14195	12.4615
Eu/Eu*	0.97954	0.840054	0.820586	0.826709	0.745348	0.696148	1.02579	0.789592	0.409476	0.71237
(La/Yb)N	13.2577	4.6702	12.0475	11.2366	12.4224	17.802	11.0419	7.43298	3.92273	10.6838
Rb/Sr	0.307289	0.116443	0.0763561	0.0714286	0.26085	0.25397	0.22875	0.0578947	0.138129	0.282108
(La/Yb)N_thickness (km)	44.2816	26.5442	42.6544	41.4697	43.1753	49.292	41.1726	34.4445	23.5791	40.6122
Age(Ma)	452.5	454.9	455	456	464.4	464.4	464.4	464.4	464.4	464.4
Data sources	H. Wang et al., 2021	R. G. Zheng et al., 2021	Y. Yuan et al., 2018	S. P. Zhuan et al., 2018	D. Xiu et al., 2018	D. Xiu et al., 2018	D. Xiu et al., 2018	D. Xiu et al., 2018	D. Xiu et al., 2018	D. Xiu et al., 2018
Rock type	tonalite	Granodiorite gneiss	diorite	diorite	tonalite	tonalite	quartz diorite	quartz diorite	quartz diorite	quartz diorite
Latitude(°N)	Shuanjingzi	Xiaoxigong	Shibanjing	Shibanjing	Gongpoquan	Gongpoquan	Gongpoquan	Gongpoquan	Gongpoquan	Gongpoquan
Longitude(°E)
Sample	JDYQ12	17DJQ14-1-3	X10-71-1	SBJ9	SBJ1	SBJ2	SBJ6	SBJ4	SBJ7	SBJ5
SiO2	61.99	70.3489	60.23	55.3	64.87	67.38	57.9	59.76	61.82	62.05
TiO2	0.63	0.2255	0.94	1.09	0.43	0.37	0.91	0.79	0.72	0.64
Al2O3	16.35	15.5868	16.55	17.04	15.95	17.21	17.34	16.88	17.47	17.17
Fe2O3T	5.471	1.9303	7.3073	9.015	3.861	2.346	7.367	6.734	5.351	5.159
FeOT	4.95663	1.73688	6.643	8.16944	3.49467	2.12585	6.67247	6.09339	4.84559	4.66956
Fe2O3	1.83			2.8	1.65	0.74	2.67	3.06	2.04	2.2
FeO	3.31			5.65	2.01	1.46	4.27	3.34	3.01	2.69
MnO	0.11	0.079	0.09	0.14	0.087	0.038	0.11	0.14	0.08	0.069
MgO	2.98	0.6139	3.19	4.13	1.92	1.04	3.43	2.9	2.06	1.83
CaO	6	3.2691	6.06	6.75	5.04	3.52	7.29	6.52	5.54	4.84
Na2O	3.39	4.4865	2.26	3.41	4.27	5.21	3.27	3.74	3.29	3.57
K2O	1.77	2.7208	2.39	1.33	1.95	1.35	1.19	1.06	2.05	2.79
P2O5	0.16	0.078	0.21	0.24	0.12	0.171	0.22	0.18	0.308	0.28
LOI	1.28	0.75892	0.83	1.99	1.53	1.34	1.24	1.48	1.24	1.52
Total	99.8		99.59	99.86	99.83	99.83	99.85	99.85	99.63	99.65
A/CNK	1.46505	1.4878	1.54528	1.48303	1.41652	1.70734	1.47574	1.49117	1.6057	1.53304
Mg#	51.7301	38.6516	46.1202	47.4002	49.4781	46.5824	47.8166	45.8978	43.1109	41.1271
Li		6.1707	61.6448
Be		1.92288	2.04028
Sc		3.13796
V	102	29.3811	133.814	153.6	53.5	39.2	150	113	104	74.5
Cr	18.2	94.4	32.9201	985.5	29.2	6.89	20.1	13.4	20	13
Co	26.2	2.64539	18.3919
Ni	21	8.09751	13.2177	148.59	12.4	2.1	11.1	6.89	6.91	5.81
Cu
Zn
Ga		18.258	20.9178	21.93	15.7	15.7	19.2	16.5	20.9	18.6
Rb	18.1	108.607	118.758	92.4	40.4	124	15.3	29.9	77.4	84.5
Sr	462	617.247	377.433	325.44	462	538	542	415	829	733
Y	16.66	12.2062	19.4941	37.81	9.76	9.93	18.5	19.2	15.4	13.7
Zr	164	114.368	261.967	237.78	136	109	126	173	177	184
Nb	0.35	17.2353	12.3075	13.58	10.4	7.59	5.28	9.1	9.9	8.59
Cs	2.05	0.9		6.86	1.96	3.75	1.44	1.62	3.97	3.6
Ba	685	936.284	490.335	374.1	492	1714	367	336	2190	1532
La	18.98	14.299	36.1528	33.01	14.3	16.5	17.1	17.9	21.7	32.2
Ce	39.18	31.8835	71.1833	77.71	27.9	39.4	43.5	36.1	52.7	67.2
Pr	5.02	3.07023	7.95142	10.46	3.54	4.78	5.13	4.87	6.72	8.59
Nd	20.71	11.635	29.5239	43.67	12.5	17.4	20.6	19.2	28.2	31
Sm	4.47	2.23802	5.81993	8.99	2.22	2.91	4.15	3.75	4.86	4.91
Eu	1.25	0.686765	1.24339	1.88	0.69	0.81	1.25	1.18	1.6	1.32
Gd	3.52	1.90359	4.60436	7.22	1.97	2.34	3.46	3.25	3.67	4.33
Tb	0.55	0.316783	0.667507	1.3	0.32	0.38	0.62	0.56	0.61	0.61
Dy	3.35	2.09959	3.75288	7.2	1.8	1.89	3.45	3.53	2.84	2.87
Ho	0.68	0.438909	0.681705	1.39	0.36	0.34	0.67	0.72	0.51	0.5
Er	1.65	1.45117	1.92244	3.62	1.04	0.96	1.81	2.07	1.45	1.46
Tm	0.33	0.225178	0.269701	0.59	0.15	0.14	0.32	0.31	0.22	0.18
Yb	1.93	1.67946	1.7227	3.36	1.06	0.9	1.85	2.17	1.36	1.18
Lu	0.26	0.277174	0.257616	0.45	0.18	0.17	0.25	0.33	0.18	0.2
Hf	9.73	3.22526	6.64235	10.24	5.7	3.8	5.48	8.32	8.52	8.53
Ta	5.15	0.977556	0.743922	1.79	0.96	0.52	1	0.7	0.45	0.52
Pb	10.1	28.7001	6.56541	7.07	7.08	18.9	10.5	7.3	12.3	8.74
Th	6.99	14.218	9.64583	6.83	6.36	6.22	4.16	5.96	1.76	4.92
U	1.84	2.44073	1.62295	1.79	1.63	1.38	1.22	1.66	0.97	0.85
Sr/Y	27.7311	50.5683	19.3614	8.60725	47.3361	54.1793	29.2973	21.6146	53.8312	53.5036
Eu/Eu*	0.931527	0.9926	0.710447	0.6915	0.988664	0.919984	0.981885	1.01038	1.11369	0.857289
(La/Yb)N	6.63015	5.74011	14.1487	6.62355	9.09525	12.3602	6.23173	5.56132	10.7574	18.3975
Rb/Sr	0.0391775	0.175954	0.314647	0.283923	0.0874459	0.230483	0.0282288	0.0720482	0.0933655	0.11528
(La/Yb)N_thickness (km)	32.5014	30.0509	45.3874	32.4845	37.8755	43.0899	31.4479	29.5129	40.7288	49.8514
Age(Ma)	464.4	482.3	525.7	881	910.9	910.9	272.4	272.4	272.4	272.4
Data sources	D. Xiu et al., 2018	Y. X. Wang et al., 2014	D. F. Song et al., 2013b	H. Y. Jiang et al., 2013	J. Soldner et al., 2020a	J. Soldner et al., 2020a	Y. An, 2018	Y. An, 2018	Y. An, 2018	Y. An, 2018
Rock type	quartz diorite	monzogranite	orthogneiss	gneiss	eclogite	amphibolite	rhyolite, Ganquan	rhyolite, Ganquan	rhyolite, Ganquan	rhyolite, Ganquan
Latitude(°N)	Gongpoquan	Shibanjing	Mazongshan	Baidunzi	40°59'15.5" N	40°59'22.0" N	Dingxin	Dingxin	Dingxin	Dingxin
Longitude(°E)					95°02'25.1" E	95°02'34.1" E
Sample	SBJ8	3	11CH09-2	X10-37-1	XIGB04	16JS98	17GQ-AS-05	17GQ-AS-02	17GQ-AS-04	17GQ-AS-03
SiO2	58.54	71.67	65.75	66.39	59.2	60.6	57.6	55.94	61.71	63.14
TiO2	0.85	0.31	0.45	0.43	1.39	0.9	1.69	1.8	1.4	1.28
Al2O3	17.65	14.91	16.76	16.17	17.9	14.4	15.27	16.12	14.39	14.36
Fe2O3T	6.881	2.024	3.35	4.02	11.4	8.4	9.84	10.17	8.81	7.97
FeOT	6.23353	1.84	3.01433	3.6172	10.2577	7.55832	8.85403	9.15097	7.92724	7.17141
Fe2O3	2.36	0
FeO	4.11	1.84
MnO	0.1	0.097	0.05	0.08	0.19	0.15	0.17	0.19	0.17	0.17
MgO	2.89	0.62	1.66	0.84	2.47	3.64	3.97	4.13	3.79	3.47
CaO	6.5	2.47	4.23	3.83	2.7	6.27	5.21	5.13	4.43	3.78
Na2O	2.63	2.67	4.33	4.25	3.88	2.55	4.07	4.32	3.25	3.59
K2O	2.51	4.14	1.82	1.63	0.48	1.28	1.26	1.26	1.38	1.59
P2O5	0.23	0.035	0.17	0.15	0.02	0.18	0.5	0.54	0.41	0.4
LOI	1.44	1.15	0.6	1.09	0.52	0.88	2.28	2.55	2.49	2.41
Total	99.81	99.91	99.17	98.88	100.1	99.3	99.68	99.68	99.83	99.83
A/CNK	1.51632	1.60668	1.61464	1.66529	2.53541	1.42574	1.44877	1.50514	1.5883	1.60268
Mg#	45.2481	37.5249	49.5369	29.276	30.032	46.1917	44.4216	44.5827	46.0109	46.309
Li					6.05	7.5
Be					0.48	3.03	1.32	1.48	1.23	1.62
Sc					25.5	18.4	27.5	33.2	25.8	23.6
V	113			27.5	110	138
Cr	28.5		20.4	7.31	132.5	67	43	49	45	45
Co					20	23.1	25.1	26	21.8	20.2
Ni	10.9		12.1	5	22.7	24.5	15.4	16	19	18.3
Cu					17.5	49	19.5	29.6	28.4	39.4
Zn					65.1	92.6
Ga	22.5				10.6	17	20.2	21.4	19.7	18.75
Rb	87	81.1	57.1	53.1	13.6	60.8	34.8	57.9	54.8	68.8
Sr	431	345	324	306	513	200	503	622	340	382
Y	22.5	14.6	7.92	18.3	43.8	37.9	33.5	39.5	38.9	32.6
Zr	246	123	15.2	274	274	212	180	258	214	192
Nb	10.3	5.73	8	7.8	27.3	11.41	9.3	9.2	10.2	11.5
Cs	4.13				0.57	2.45	2.76	2.84	2.53	2.65
Ba	783	832	280	307	70.3	222	590	650	550	590
La	47	28.3	50.3	15.6	9.4	46.6	17.4	21.4	25.5	28.3
Ce	93.1	3.5	95.1	36.9	19.4	92.2	41.5	49.9	55.2	60.9
Pr	10.9	12.8	10.4	4.04	2.16	10.9	5.58	6.56	6.98	7.61
Nd	39.6	2.4	35	17.5	8.74	38.5	23.7	27.9	27.6	29.5
Sm	6.8	0.85	4.74	3.61	2.36	6.89	5.63	6.56	6.04	6.22
Eu	1.58	2.05	0.88	1.67	0.8	1.41	1.91	2.24	1.9	1.91
Gd	6.42	0.29	3.64	3.59	5.62	5.47	6.44	7.47	6.41	6.45
Tb	0.92	1.59	0.42	0.59	1.08	0.95	1.03	1.17	1.01	1
Dy	4.55	0.32	1.85	3.58	7.25	5.77	6.37	7.24	6.19	6
Ho	0.82	0.87	0.33	0.78	1.6	1.3	1.27	1.47	1.27	1.19
Er	2.25	0.14	0.81	2.48	4.24	3.61	3.53	4.18	3.52	3.43
Tm	0.33	0.88	0.12	0.34	0.59	0.51	0.48	0.59	0.49	0.5
Yb	1.94	0.13	0.7	2.36	3.95	3.54	3.05	3.7	3.1	3.13
Lu	0.28	8.99	0.1	0.38	0.63	0.56	0.46	0.57	0.48	0.48
Hf	6.7	3.05	0.41	6.41	6.75	5.18	4.7	6.6	5.3	5.5
Ta	0.61	0.46	0.49	0.37	2.08	0.56	0.65	0.65	0.72	0.81
Pb	5.33		12.2	9.68	3.5	18.8	9.2	8.9	10.1	10.6
Th	9.6	3.44	20.4	2.35	3.36	15.6	4.27	5.35	6.22	8.87
U	1.19	0.86	0.42	0.41	0.96	0.97	2.7	3.9	2.5	3
Sr/Y	19.1556	23.6301	40.9091	16.7213	11.7123	5.27704	15.0149	15.7468	8.74036	11.7178
Eu/Eu*	0.720644	10.1817	0.624205	1.40367	0.644018	0.679633	0.967176	0.975508	0.927809	0.914999
(La/Yb)N	16.3336	146.767	48.4456	4.45653	1.60441	8.87498	3.84622	3.89939	5.54579	6.09574
Rb/Sr	0.201856	0.235072	0.176235	0.173529	0.0265107	0.304	0.0691849	0.0930868	0.161176	0.180105
(La/Yb)N_thickness (km)	47.8285	85.1541	66.3113	25.748	8.38059	37.4587	23.2443	23.4777	29.4654	31.0728
Age(Ma)	298	298	298	298	315.9	315.9	315.9	315.9	325	359.9
Data sources	Y. H. Li et al., 2012	Y. H. Li et al., 2012	Y. H. Li et al., 2012	Y. H. Li et al., 2012	Y. Y. Chen et al., 2019	Y. Y. Chen et al., 2019	Y. Y. Chen et al., 2019	Y. Y. Chen et al., 2019	Y. Yuan et al., 2018	Z. L. Pan et al., 2017b
Rock type	andesite	andesite	andesite	andesite	dacitic tuff	dacitic tuff	dacitic tuff	dacitic tuff	dacite	basalt, Hongliuyuan Fm.
Latitude(°N)	Maotoushan	Maotoushan	Maotoushan	Maotoushan	Yuanbaoshan	Yuanbaoshan	Yuanbaoshan	Yuanbaoshan	Shuangjingzi	Shuanjingzi
Longitude(°E)
Sample	8-52YQ	8-56YQ	8-57YQ	8-80YQ	YQ-2	YQ-4	YQ-3	YQ-1	X10-45-1	PM14YQ9
SiO2	58.2	56.74	57.69	61.22	66.26	65.79	65.73	64.91	66.58	55.73
TiO2	0.72	0.8	0.87	1	0.44	0.56	0.54	0.54	0.64	2.59
Al2O3	17.08	17.25	17.42	15.83	16.03	15.74	16.09	15.62	15.54	12.66
Fe2O3T	5.52	6.47	6.27	6.55	4.353	4.991	4.48	5.084	4.95	11.079
FeOT	4.9904	5.84521	5.66934	5.93661	3.94166	4.51553	4.04848	4.60463	4.5	10.024
Fe2O3	2.99	3.94	3.3	1.93	1.68	2.34	2.61	1.85		5.15
FeO	2.3	2.3	2.7	4.2	2.43	2.41	1.7	2.94		5.39
MnO	0.08	0.09	0.08	0.11	0.1	0.1	0.081	0.12	0.06	0.13
MgO	2.9	3.71	3.51	2.42	1.2	1.61	1.31	1.49	1.36	3.63
CaO	4.94	6.84	7.18	4.6	4.02	3.2	3.92	3.28	3.38	6.7
Na2O	4.24	3.87	3.78	5.15	4.29	4.28	4.16	4.87	4.67	4.67
K2O	1.12	0.95	1.19	1.6	1.39	2	1.89	1	1.61	0.71
P2O5	0.15	0.24	0.26	0.21	0.13	0.13	0.11	0.12	0.14	0.38
LOI	1.74	2.03	2.44	3.07	1.92	15.74	16.09	3.1	1.31	2.11
Total	99.93	99.42	99.22	100.01	101.38	2.34	2.61	101.65	99.79	99.84
A/CNK	1.65825	1.47942	1.43374	1.39471	1.65258	1.66034	1.61384	1.7071	1.6087	1.04801
Mg#	50.8807	53.0822	52.4625	42.0838	35.1775	38.8588	36.58	36.5806	35.011	39.2287
Li									13.0618
Be									2.18661
Sc
V									112.174	308
Cr					10.22	9.7	20	8.56	6.07496	58.3
Co					10.12	10	13	10.01	8.64213	23.1
Ni					5.34	4.3	13	3.41	4.67319	11.9
Cu
Zn
Ga									16.5935	18.7
Rb	48.2	24.3	25.5	30.8	41.91	49.8	41.9	6.48	59.177	17.2
Sr	410	550	563	557	273	335	252	287	299.244	350
Y	13.43	16.8	17	25.05	23	30.1	24.4	33.1	38.5904	45.5
Zr	112	140	141	177	150.53	132	111	166.56	177.897	279
Nb	10.24	13.36	14.28	17.03	6.15	5.61	11.7	3.95	8.93849	9.1
Cs										2.1
Ba	187	159	147	130	563	566	505	396	388.207	163
La	9.54	12.18	12.26	14.74	14.3	18	18.6	20.1	25.552	16.4
Ce	20.11	27.07	27.01	32.93	29.3	35	29.8	40.1	54.3285	38.5
Pr	2.92	3.89	3.81	4.61	3.89	4.93	4.92	5.46	6.72695	5.9
Nd	11.24	15.36	15.28	19.03	16.4	21.4	21.4	23.5	27.641	27.8
Sm	2.66	3.38	3.49	4.53	3.56	5.03	4.68	5.37	6.56221	7.4
Eu	0.86	1.1	1.14	1.31	1.02	1.39	1.46	1.39	1.51855	2.2
Gd	2.64	3.42	3.54	4.75	3.43	4.73	4.23	4.99	6.12553	7.1
Tb	0.45	0.56	0.58	0.81	0.64	0.81	0.71	0.98	1.01894	1.4
Dy	2.76	3.42	3.53	4.97	4.12	5.26	4.39	6.1	6.2575	8.6
Ho	0.55	0.69	0.7	1.01	0.84	0.98	0.79	1.24	1.30047	1.7
Er	1.57	1.95	1.98	2.87	2.49	2.93	2.31	3.68	3.8134	4.9
Tm	0.25	0.31	0.31	0.46	0.42	0.52	0.42	0.6	0.598127	0.8
Yb	1.57	1.91	1.93	2.9	2.76	3.04	2.43	4	4.015	4.6
Lu	0.25	0.32	0.32	0.48	0.43	0.48	0.39	0.64	0.584912	0.7
Hf	3	3.6	4	5.4	4.68	4.1	3.7	5.37	4.73808	7.8
Ta	0.26	0.32	0.3	0.36	0.44	0.3	0.34	0.31	0.634225	0.7
Pb									7.01051	5.3
Th	2.1	2.1	1.9	2.8	4.77	5	4.8	4.13	9.02807	3.4
U	0.49	0.49	0.48	0.67	1.51	2	1.7	1.08	2.71346	1.3
Sr/Y	30.5287	32.7381	33.1176	22.2355	11.8696	11.1296	10.3279	8.67069	7.75435	7.69231
Eu/Eu*	0.981845	0.980156	0.982735	0.857489	0.881124	0.858496	0.98502	0.808102	0.721098	0.915885
(La/Yb)N	4.09669	4.29931	4.2827	3.42676	3.4931	3.99194	5.16049	3.38782	4.29065	2.40365
Rb/Sr	0.117561	0.0441818	0.0452931	0.0552962	0.153516	0.148657	0.16627	0.0225784	0.197755	0.0491429
(La/Yb)N_thickness (km)	24.3168	25.1375	25.0717	21.2812	21.6072	23.8764	28.2413	21.0869	25.1032	15.2525
Age(Ma)	359.9	359.9	363.5	363.5	363.5	363.5	363.5	368.1	368.1	368.1
Data sources	Z. L. Pan et al., 2017b	Z. L. Pan et al., 2017b	J. Tian et al., 2020b	J. Tian et al., 2020b	J. Tian et al., 2020b	J. Tian et al., 2020b	J. Tian et al., 2020b	J. Tian et al., 2020b	J. Tian et al., 2020b	J. Tian et al., 2020b
Rock type	basalt, Hongliuyuan Fm.	spilite, Hongliuyuan Fm.	dacite	dacite	dacite	andesite	dacite	dacitic tuff	dacitic tuff	dacitic tuff
Latitude(°N)	Shuanjingzi	Shuanjingzi	Baiyunshan	Baiyunshan	Baiyunshan	Baiyunshan	Baiyunshan	Baiyunshan	Baiyunshan	Baiyunshan
Longitude(°E)
Sample	PM14YQ5	JDYQ2	PM04YQ05 -1	PM06YQ40 -1	Pml5YQ35 -1	YQ4200 -1	Pml5YQ35 -2	Pml5YQ34 -1	YQ4001-1	Pml5YQ34 -2
SiO2	64.45	60.06	68.57	67.65	64.98	58.05	65.7	67.04	68.37	63.87
TiO2	1.41	1.8	0.67	0.61	0.65	0.78	0.63	0.73	1.17	0.84
Al2O3	13.74	12.57	15.95	14.54	16.47	16.13	16.9	13.65	13.13	15.8
Fe2O3T	6.273	9.097	4.659	4.31	4.275	5.359	4.319	4.947	6.739	5.543
FeOT	5.67848	8.23423	4.19922	3.88018	3.86555	4.85054	3.90249	4.45407	6.06978	4.98994
Fe2O3	2.61	3.85	3.9	4.09	2.24	2.29	2.57	4.65	6.09	5.29
FeO	3.33	4.77	0.69	0.2	1.85	2.79	1.59	0.27	0.59	0.23
MnO	0.06	0.13	0.18	0.15	0.17	0.07	0.17	0.21	0.31	0.21
MgO	2.61	4.55	1.46	1.21	3.01	3.86	2.76	1.85	1.42	1.6
CaO	3.39	4.14	3.55	3.32	2.81	4.36	2.9	3.49	2.69	3.77
Na2O	3.22	5.21	4.08	8.11	7.58	3.92	5.29	7.73	4.79	7.27
K2O	1.72	0.06	0.91	0.08	0.17	0.71	1.43	0.22	1.36	0.97
P2O5	0.23	0.4	0.18	0.15	0.17	0.22	0.17	0.21	0.31	0.21
LOI	3.04	2.37
Total	99.8	99.9	100.12	100.09	100.09	93.18	100.1	100.04	100.24	100.05
A/CNK	1.64946	1.33581	1.86768	1.26325	1.55966	1.79422	1.75676	1.19318	1.48529	1.31557
Mg#	45.034	49.6216	38.2624	35.7272	58.1242	58.6524	55.7656	42.5412	29.4292	36.369
Li			1.97	5.56	7.18	44.5	18.2	0.14	0.6	0.2
Be			0.97	1.1	0.8	1.21	1.38	0.93	1.58	1.53
Sc			3.71	7	5.75	11.4	6.4	4.16	12.2	5.12
V	137	198.9	50.9	55.6	65.9	90.1	77.8	16.6	53.4	31.3
Cr	7.6	64.1	39	30.3	46.1	84.7	42.8	8.72	33.6	15.6
Co	22.7	20.6	7.59	6.88	13.3	17.2	12.5	5.11	11.8	5.61
Ni	5.1	11.3	21.7	23.4	23.1	51	21.5	3.25	18	7.93
Cu			9.22	10.2	8.05	17.3	9.16	4.56	8.56	5.03
Zn			53.4	30.6	66.3	50.4	64.2	82.1	62.1	63.2
Ga	18.6	16.2	14.1	10.9	15.6	19	18.8	9.88	15.8	12.7
Rb	35.3	1	19.9	0.98	4.32	17.7	22.4	3.71	29.8	17.3
Sr	425	177.4	501	428	415	468	478	216	216	221
Y	29.6	52.1	9.44	10.8	12.2	13.7	13.6	36.8	29.6	36.2
Zr	286	241.7	125	105	141	130	152	324	314	365
Nb	10.5	6.2	5.4	4.1	4.99	5.89	5.52	7.75	9.38	8.88
Cs	1.6	0.2	13	0.21	0.63	5.23	1.76	0.21	1.72	0.51
Ba	613	39.4	171	69.5	747	210	187	196	246	181
La	22	23.5	12	14.4	15.7	16.9	17.8	22.9	28.8	31.6
Ce	47	54.5	34.6	24.5	32.9	37.3	34.8	52.3	63.2	69.4
Pr	6.3	7.6	4.03	3.79	4.3	5.1	4.81	6.6	8.56	10
Nd	26.2	33.1	16.9	15.2	17.7	21.1	19	26.7	34.8	42.7
Sm	5.6	8.4	3.44	2.93	3.49	4.39	3.66	5.98	7.66	8.97
Eu	1.4	2.3	0.86	0.84	1.09	1.2	0.92	1.44	1.46	1.77
Gd	5.3	8.7	2.79	2.97	3.56	4.42	3.64	7.15	6.66	8.26
Tb	1	1.7	0.37	0.4	0.46	0.55	0.51	1.22	1.18	1.28
Dy	5.7	10.2	2.09	2.19	2.48	2.85	2.8	7.32	7.3	7.4
Ho	1.1	2.1	0.37	0.43	0.48	0.53	0.53	1.42	1.48	1.45
Er	3.2	5.7	0.96	1.12	1.33	1.38	1.47	3.78	4.14	3.88
Tm	0.5	0.9	0.14	0.16	0.19	0.2	0.22	0.55	0.65	0.58
Yb	3.1	5.1	0.96	1.11	1.32	1.34	1.49	3.63	4.36	3.89
Lu	0.5	1	0.14	0.18	0.21	0.21	0.23	0.55	0.66	0.6
Hf	6.6	7.5	3.75	3.09	4.24	3.86	4.52	8.13	9.34	9.15
Ta	0.7	0.5	0.4	0.33	0.41	0.36	0.44	0.62	0.68	0.72
Pb	25.8	5.5	9.72	7.16	5.05	7.16	9.98	6.47	9.36	11.6
Th	5.5	2.9	3.02	3.43	4.06	2.83	4.53	8.92	10.2	10.6
U	1.4	0.9	1	0.95	1.11	0.96	1.2	1.89	2.16	2.75
Sr/Y	14.3581	3.40499	53.072	39.6296	34.0164	34.1606	35.1471	5.86957	7.2973	6.10497
Eu/Eu*	0.774588	0.816316	0.823608	0.862767	0.937339	0.825021	0.762691	0.672417	0.611233	0.618335
(La/Yb)N	4.7846	3.10658	8.42742	8.74629	8.01882	8.50289	8.05412	4.25318	4.45339	5.47674
Rb/Sr	0.0830588	0.00563698	0.0397206	0.00228972	0.0104096	0.0378205	0.0468619	0.0171759	0.137963	0.0782805
(La/Yb)N_thickness (km)	26.9556	19.6136	36.5791	37.2105	35.7342	36.7306	35.8089	24.9541	25.736	29.2524
Age(Ma)	419	431.2	441	442.2	442.2	450	454.7	454.7	489	533
Data sources	D. Y. Zhang et al., 2020	R. G. Zheng et al., 2019	D. F. Song et al., 2015	Q. G. Mao et al., 2012a	Q. G. Mao et al., 2012a	J. X. Wang et al., 2020	J. Q. Xie et al., 2018	J. Q. Xie et al., 2018	D. Y. Zhang et al., 2020	S. J. Ao et al., 2012
Rock type	andesitic porphyry	andesite	volcanic rock	dacite	dacite	andesite	meta-dacite	meta-dacite	andesite	andesite
Latitude(°N)	Xiaohulishan	Xiaohuangshan	Mazongshan	Liuyuan	Liuyuan	Mazongshan	Huaniushan	Huaniushan	Xiaohulishan	Yueyashan
Longitude(°E)
Sample	XHLS-01	BS44-1	12LBQ27	06LY01-1	08LY01 -05	P4-8	HN4-5	HN4-4	XHLS-02	09YYS91
SiO2	58.19	57.71	59.08	69.91	70.31	56.83	63.32	64.2	67.24	59.27
TiO2	0.57	0.85	0.64	0.42	0.42	1.34	0.75	0.88	0.74	1.12
Al2O3	16.78	17.61	16.63	14.96	13.12	16.15	16.67	17.62	14.3	13.1
Fe2O3T	6.549	6.61	7.16	3.06	3.48	8.005	5.22	3.63	5.823	10.71
FeOT	5.94379	5.94768	6.44257	2.75339	3.1313	7.24429	4.69696	3.26627	5.28174	9.63686
Fe2O3	1.06					3.55			1.28
FeO	4.99	3.21			2.85	4.05			4.13
MnO	0.12	0.09	0.06	0.06	0.05	0.08	0.13	0.13	0.06	0.21
MgO	2.71	5.43	2.59	0.69	0.78	3.42	2.06	1.76	2.28	3.52
CaO	5.85	5.9	7.84	2.12	2.15	7.02	4.23	7.05	0.92	5.12
Na2O	4.12	3.8	3.06	4	4.07	3.52	3.24	0.7	6.02	5.18
K2O	1.66	1.77	0.04	3.63	3.09	1.28	3.08	2.56	0.38	0.19
P2O5	0.4	0.23	0.15	0.1	0.14	0.4	0.26	0.29	0.2	0.15
LOI	2.78	3.55	2.4	0.88	2.01	1.64	0.82	0.48	1.81	1.5
Total	99.23	99.92	99.65	99.83	102.47	99.3	99.78	99.3	99.36	100.07
A/CNK	1.44282	1.53531	1.52011	1.53436	1.40924	1.36633	1.58009	1.70902	1.95355	1.24881
Mg#	44.8345	61.9393	41.7454	30.8774	30.7491	45.6973	43.8766	48.9926	43.4861	39.4342
Li		11.1
Be		1.05
Sc		23.3	14.45			27.02				33.8
V	156	148			27.8	184.93			96.8	332
Cr	15.9	87.4		1.04	272	71.58			62	6.15
Co		24.8		4.75	6.54	16.4				31.1
Ni		59.2		5.07	12.8	20.64				4.52
Cu				11.11	22.4					4.95
Zn				33.69	47.8					35.5
Ga		19.6		16.37	17.7		21.5	22		12.8
Rb	31.7	43.9	0.84	74.94	86.7	45.01	133	100.5	9.61	1.32
Sr	585	531	1016.48	222.36	260	450.08	380	301	201	103
Y	14	16.1	21.07	27.99	34.1	38.52	26.5	26	15.4	30
Zr	87.6	107	131.83	222.39	451	248.06	209	235	166	61.4
Nb	3.8	3.11	5	14.31	14	8.68	20.1	21.8	7.49	2.36
Cs	1.34	0.513		0.6	0.81	0.57	14.1	14.7	1.46	0.5
Ba	947	397	33.72	706.47	797	301.9	646	500	126	32.9
La	14.5	18.7	16.78	37.37	45.5	23.22	47.5	48.5	16.5	4.74
Ce	24.3	34.7	33.86	69.38	83.6	53.13	88.3	91.7	42	11.9
Pr	3.65	4.46	4.99	8.14	9.44	7.71	9.71	10.05	4.46	1.83
Nd	15.1	17.1	20.75	28.6	34.3	36.23	35.1	36.7	18.1	9.64
Sm	3.16	4.12	4.39	5.52	6.4	8.63	6.42	6.55	3.68	3.15
Eu	1.07	1.32	1.08	1.1	1.34	2.01	1.73	1.71	0.74	1.06
Gd	2.99	3.45	4.13	4.92	6.36	7.75	5.14	5.36	3.32	4.02
Tb	0.47	0.598	0.67	0.83	0.95	1.38	0.76	0.78	0.54	0.74
Dy	2.71	2.81	4.03	5.05	5.79	8.45	4.43	4.71	3.08	4.72
Ho	0.54	0.535	0.83	1.08	1.21	1.65	0.87	0.9	0.62	1.07
Er	1.54	1.52	2.28	3.09	3.66	4.63	2.61	2.58	1.65	3.26
Tm	0.24	0.251	0.35	0.48	0.53	0.69	0.42	0.39	0.25	0.48
Yb	1.69	1.38	2.24	3.28	3.78	3.92	2.54	2.66	1.69	3.27
Lu	0.28	0.205	0.35	0.49	0.59	0.67	0.37	0.4	0.26	0.48
Hf	2.71	3.11	3.93	6.26	11	7.04	5.8	6.2	4.98	1.87
Ta	0.29	0.239	0.32	1.14	0.98	0.38	1.5	1.7	0.66	0.16
Pb		5.55	25.85	8.74	9	2.22	21	35		0.23
Th	3.2	4.49	5.21	17.63	19.9	2.54	13.7	14.85	7.45	0.48
U	1.08	0.753	1.44	3.68	4.34	1.82	3.45	3.84	3.37	0.52
Sr/Y	41.7857	32.9814	48.243	7.94427	7.62463	11.6843	14.3396	11.5769	13.0519	3.43333
Eu/Eu*	1.04923	1.04266	0.764137	0.63276	0.635497	0.737321	0.892099	0.857158	0.635401	0.910607
(La/Yb)N	5.7845	9.13581	5.05043	7.68128	8.11529	3.99356	12.608	12.2926	6.58236	0.977271
Rb/Sr	0.054188	0.0826742	0.000826381	0.337021	0.333462	0.100004	0.35	0.333887	0.0478109	0.0128155
(La/Yb)N_thickness (km)	30.1818	37.9512	27.8748	35.0031	35.9375	23.8834	43.4273	42.9967	32.3784	-0.0471074
Age(Ma)	533	533	533	533	533	535	402.3	451.4	436.1	284.2
Data sources	S. J. Ao et al., 2012	S. J. Ao et al., 2012	S. J. Ao et al., 2012	S. J. Ao et al., 2012	S. J. Ao et al., 2012	Y. R. Shi et al., 2018	This study	This study	This study	This study
Rock type	andesite	andesite	andesite	andesite	dacite	andesite	Monzogranite	Bt-monzogranite	Diorite	Granite
Latitude(°N)	Yueyashan	Yueyashan	Yueyashan	Yueyashan	Yueyashan	Xichangjing	Liuyuan	Liuyuan	Liuyuan	Liuyuan
Longitude(°E)
Sample	09YYS40	09YYS92	09YYS43	09YYS41	09YYS27	XCJ04-1	LJ2020-23	LJ2020-25	LJ2020-46	LY1908-80
SiO2	56.74	60.51	60.94	64.7	70.27	60.15	65.107	64.011	65.826	70.617
TiO2	0.85	1.01	1.14	0.92	0.21	0.16	0.565	0.523	0.414	0.324
Al2O3	15.18	12.56	13.16	13.65	14.53	16.78	16.466	16.401	16.3	15.17
Fe2O3T	10.88	8.91	10.53	8.54	1.67	1.369	3.524	4.667	3.617	2.431
FeOT	9.78982	8.01722	9.47489	7.68429	1.50267	1.23786	3.1709	4.19937	3.25458	2.18741
Fe2O3						0.72	1.104	1.741	2.0495	0.671
FeO						0.59	2.2	2.66	1.425	1.6
MnO	0.09	0.11	0.17	0.1	0.02	0.03	0.051	0.087	0.062	0.044
MgO	3.85	2.09	2.69	1.94	1.08	3.02	1.862	1.623	1.23	0.899
CaO	4.81	9.16	3.23	2.96	1.9	5.22	1.98	4.769	3.005	3.949
Na2O	6.1	2.35	5.19	5.79	7.71	8.35	5.987	2.93	4.827	4.584
K2O	0.59	0.02	0.07	0.31	0.51	0.02	1.998	3.441	2.454	0.758
P2O5	0.08	0.17	0.22	0.25	0.07	0.04	0.263	0.173	0.163	0.08
LOI	0.86	3.24	2.14	1.02	1.82	5.42	1.817	1.241	2.151	1.249
Total	100.03	100.14	99.49	100.18	99.79	100.5	99.62	99.866	100.049	100.105
A/CNK	1.32	1.08933	1.55006	1.50662	1.43577	1.23473	1.65238	1.47226	1.58468	1.63276
Mg#	41.2114	31.726	33.6023	31.0356	56.1624	81.3044	51.1416	40.7908	40.2511	42.2833
Li							7.19919	15.081	14.2279	9.4116
Be							2.34024	2.22633	2.05388	0.740487
Sc	35.2	26.3	30.3	20.4	3.49	3.09	6.29419	9.24881	4.86645	4.49763
V	367	247	225	82.7	20.7	18.1	54.6178	57.3037	52.0203	30.2906
Cr	7.48	3.65	2.37	3.04	14.2	67.4	41.4629	11.5553	4.47422	4.28199
Co	16.4	20	26	16.3	3.98	4.85	9.41983	7.43863	6.90352	5.01581
Ni	22.5	4.2	1.67	1.86	13.8	30.7	35.5088	4.00649	3.29136	3.85115
Cu	7.23	30	58.8	61	6.64	5.93	40.3656	3.2453	13.8566	1.80649
Zn	28.6	21.3	51.1	50.4	28	12.5	39.2655	54.8502	57.0312	24.4806
Ga	13.8	17.5	14.2	16.6	16.1	9.31	21.1887	18.8185	19.9936	15.802
Rb	5.36	0.17	0.56	2.75	5.01	0.47	83.8106	109.498	91.6287	35.5172
Sr	188	255	109	162	234	63.7	296.674	476.349	678.842	219.572
Y	34.5	35.1	42	51.7	6.26	4.35	9.73328	21.9266	11.6173	10.6144
Zr	55.3	77.9	94.2	131	138	29.8	170.865	164.723	133.429	137.38
Nb	0.9	3.12	3.52	3.77	1.6	1.53	4.51451	10.5335	13.874	2.44223
Cs	0.33	0.067	0.19	0.26	0.27	0.09	1.36947	3.15166	1.1772	1.54675
Ba	98.3	6.53	20	61.2	104	17.2	222.19	805.448	737.823	114.196
La	5.46	6.36	8.39	9.96	14.8	12.1	13.2473	26.0563	21.7057	7.88897
Ce	16.8	16.2	21.3	26.7	28.1	24.1	25.1448	50.9493	44.9696	16.0346
Pr	2.54	2.47	3.23	4.15	3.18	2.94	2.93654	5.71762	5.04447	1.96432
Nd	12.7	12.1	16.4	21.1	11.4	10.7	11.1568	21.5966	19.3383	7.78497
Sm	3.83	4.03	4.79	6.01	1.99	1.66	2.22918	4.48499	3.70634	1.82515
Eu	0.8	1.33	1.47	1.69	0.56	0.27	0.78259	1.24336	0.9296	0.653898
Gd	4.63	4.79	5.87	7.24	1.6	1.15	2.01609	4.06978	2.93578	1.86841
Tb	0.89	0.88	1.06	1.33	0.21	0.14	0.281472	0.655597	0.415294	0.307441
Dy	5.55	5.66	6.9	8.52	1.04	0.71	1.65657	3.92386	2.25337	1.81079
Ho	1.21	1.23	1.55	1.83	0.2	0.15	0.303776	0.718726	0.360003	0.33697
Er	3.55	3.73	4.36	5.31	0.54	0.52	0.881806	2.10172	0.930745	1.04135
Tm	0.54	0.55	0.65	0.79	0.067	0.07	0.122368	0.31437	0.14359	0.149927
Yb	3.8	3.76	4.39	5.42	0.45	0.62	0.834555	1.98769	0.920659	1.00157
Lu	0.54	0.54	0.65	0.81	0.072	0.12	0.146303	0.302182	0.138413	0.155278
Hf	1.67	2.33	2.79	3.8	3.57	1.1	3.96341	4.2953	3.91244	3.58766
Ta	0.05	0.22	0.23	0.25	0.11		0.431076	0.828506	1.05872	0.229071
Pb	0.36	1.01	0.62	0.84	4.42	0.34	8.0077	19.018	16.6856	4.23482
Th	0.88	0.65	0.92	1.22	3.55	0.53	5.00399	6.71596	6.48358	1.99292
U	0.51	0.54	0.53	0.8	0.95	0.2	1.09944	1.29112	2.13633	0.485929
Sr/Y	5.44928	7.26496	2.59524	3.13346	37.3802	14.6437	30.4804	21.7247	58.4335	20.6863
Eu/Eu*	0.580229	0.924149	0.846952	0.782425	0.930131	0.567201	1.1082	0.873937	0.833672	1.07358
(La/Yb)N	0.96871	1.14039	1.28849	1.23892	22.1735	13.1576	10.7018	8.83789	15.895	5.31035
Rb/Sr	0.0285106	0.000666667	0.00513761	0.0169753	0.0214103	0.00737834	0.2825	0.22987	0.134978	0.161756
(La/Yb)N_thickness (km)	-0.196698	2.57705	4.65278	3.98587	53.025	44.1528	40.6408	37.3875	47.3658	28.7279
Age(Ma)	284.2	284.2	421	421
Data sources	This study	This study	This study	This study
Rock type	Granite	Granite	Granite	Granite
Latitude(°N)	Liuyuan	Liuyuan	Liuyuan	Liuyuan
Longitude(°E)
Sample	LY1908-79	LY1908-83	LY1908-1	LY1908-2
SiO2	70.752	70.225	66.008	67.471
TiO2	0.331	0.319	0.64	0.589
Al2O3	15.306	15.125	15.144	14.185
Fe2O3T	2.506	2.408	4.367	3.997
FeOT	2.2549	2.16672	3.92943	3.5965
Fe2O3	0.779	0.659	1.463	2.127
FeO	1.57	1.59	2.64	1.7
MnO	0.053	0.045	0.079	0.069
MgO	0.929	0.913	2.099	1.526
CaO	3.692	3.92	3.961	4.071
Na2O	4.598	4.545	3.45	3.619
K2O	0.724	0.751	2.177	2.855
P2O5	0.079	0.079	0.133	0.129
LOI	0.909	1.222	1.666	1.575
Total	99.879	99.552	99.724	100.086
A/CNK	1.69803	1.64117	1.57947	1.34519
Mg#	42.3428	42.8935	48.7753	43.0632
Li	11.6345	9.12717	11.0299	8.60791
Be	0.690623	0.751572	3.12837	2.85352
Sc	4.65051	4.47584	9.42833	9.22615
V	29.934	30.0527	74.1874	72.1801
Cr	4.46152	4.08954	31.6377	31.7713
Co	4.91644	4.88855	9.95143	9.12442
Ni	4.41272	3.69408	10.5968	9.45163
Cu	3.29547	1.86574	3.35291	1.98457
Zn	29.9564	24.5436	49.2222	33.8136
Ga	15.8996	15.4788	20.9063	22.3757
Rb	30.035	35.142	85.5304	119.047
Sr	206.466	219.748	260.658	394.424
Y	10.74	10.4806	29.6783	26.7387
Zr	131.188	133.716	153.801	140.706
Nb	2.64821	2.39494	16.1902	14.5159
Cs	1.21666	1.4808	1.59672	0.89867
Ba	115.959	114.321	226.719	287.102
La	8.54034	7.85555	27.044	24.4113
Ce	17.4101	16.3753	59.873	52.014
Pr	2.11396	1.956	6.58275	5.84439
Nd	8.51672	7.91645	24.8018	21.9529
Sm	1.86101	1.79153	4.99989	4.48033
Eu	0.644986	0.655236	0.986189	0.887301
Gd	2.02515	1.89495	4.93817	4.15699
Tb	0.317152	0.301403	0.793255	0.680285
Dy	1.83239	1.75756	4.92083	4.39372
Ho	0.351317	0.3466	1.01775	0.859759
Er	0.982483	0.990394	2.91598	2.55457
Tm	0.149297	0.154285	0.461181	0.42351
Yb	0.977827	0.996074	3.10686	2.75445
Lu	0.149675	0.155363	0.477198	0.425956
Hf	3.38602	3.55375	4.71667	4.20747
Ta	0.23037	0.241965	1.69331	1.39898
Pb	4.02121	4.35143	11.9875	13.1025
Th	1.95701	2.12388	18.6065	15.1032
U	0.383271	0.490455	3.57133	4.47988
Sr/Y	19.2241	20.9672	8.78277	14.751
Eu/Eu*	1.01082	1.08033	0.600247	0.618667
(La/Yb)N	5.88841	5.31703	5.86858	5.97503
Rb/Sr	0.145471	0.15992	0.328132	0.301824
(La/Yb)N_thickness (km)	30.4845	28.7493	30.4272	30.7328
*References listed in Table S3.
